# Supplementary material for: Lifespan extension in female mice by early, transient exposure to adult female olfactory cues
Source: eLife. 2022 Dec 16;11:e84060. doi: 10.7554/eLife.84060 (PMC9904757; doi:10.7554/eLife.84060)
Supplement: Figure 1—source data 1. [file elife-84060-fig1-data1.xlsx]

## Sheet: RAM
UMN	Sex	Rx	Gene	Status	Age	Dead
OMP0727	F	FU	Het	Dead	983	1
OMP0728	F	FU	Het	Dead	436	1
OMP0748	F	FU	Het	Dead	810	1
OMP0751	F	FU	Het	Dead	821	1
OMP0764	F	FU	Het	REMOVED	622	0
OMP0765	F	FU	Het	Dead	349	1
OMP0807	F	FU	Het	Dead	813	1
OMP0810	F	FU	Het	Dead	393	1
OMP0811	F	FU	Het	Dead	527	1
OMP0812	F	FU	Het	Dead	301	1
OMP0822	F	FU	Het	Dead	800	1
OMP0823	F	FU	Het	Dead	549	1
OMP1081	F	FU	Het	Dead	618	1
OMP1082	F	FU	Het	Dead	714	1
OMP1110	F	FU	Het	Dead	485	1
OMP1113	F	FU	Het	Dead	383	1
OMP1198	F	FU	Het	Dead	686	1
OMP1201	F	FU	Het	Dead	565	1
OMP1202	F	FU	Het	Dead	735	1
OMP1208	F	FU	Het	Dead	846	1
OMP1245	F	FU	Het	Dead	715	1
OMP1247	F	FU	Het	Dead	823	1
OMP1276	F	FU	Het	Dead	538	1
OMP1277	F	FU	Het	Dead	554	1
OMP1323	F	FU	Het	Dead	714	1
OMP1338	F	FU	Het	Dead	427	1
OMP1449	F	FU	Het	Dead	571	1
OMP1452	F	FU	Het	Dead	444	1
OMP1520	F	FU	Het	Dead	586	1
OMP1522	F	FU	Het	Dead	657	1
OMP0643	F	MU	Het	Dead	693	1
OMP0644	F	MU	Het	Dead	647	1
OMP0704	F	MU	Het	Dead	684	1
OMP0705	F	MU	Het	Dead	583	1
OMP1022	F	MU	Het	Dead	641	1
OMP1030	F	MU	Het	Dead	778	1
OMP1131	F	MU	Het	Dead	401	1
OMP1132	F	MU	Het	Dead	606	1
OMP1144	F	MU	Het	Dead	578	1
OMP1147	F	MU	Het	Dead	547	1
OMP1191	F	MU	Het	Dead	325	1
OMP1193	F	MU	Het	Dead	545	1
OMP1217	F	MU	Het	Dead	138	1
OMP1220	F	MU	Het	Dead	382	1
OMP1282	F	MU	Het	Dead	297	1
OMP1283	F	MU	Het	Dead	298	1
OMP1285	F	MU	Het	Dead	328	1
OMP1286	F	MU	Het	Dead	381	1
OMP1314	F	MU	Het	Dead	711	1
OMP1315	F	MU	Het	Dead	309	1
OMP1477	F	MU	Het	Dead	738	1
OMP1479	F	MU	Het	Dead	589	1
OMP1480	F	MU	Het	REMOVED	729	0
OMP1481	F	MU	Het	Dead	588	1
OMP1550	F	MU	Het	Dead	809	1
OMP1554	F	MU	Het	Dead	471	1
OMP1574	F	MU	Het	Dead	852	1
OMP1575	F	MU	Het	Dead	653	1
OMP1619	F	MU	Het	Dead	528	1
OMP1627	F	MU	Het	REMOVED	627	0
OMP0553	F	ZU	Het	Dead	756	1
OMP0591	F	ZU	Het	Dead	608	1
OMP0592	F	ZU	Het	Dead	297	1
OMP0595	F	ZU	Het	Dead	576	1
OMP0676	F	ZU	Het	Dead	752	1
OMP0677	F	ZU	Het	Dead	422	1
OMP0861	F	ZU	Het	Dead	546	1
OMP0862	F	ZU	Het	Dead	677	1
OMP0982	F	ZU	Het	Dead	520	1
OMP0989	F	ZU	Het	Dead	603	1
OMP0999	F	ZU	Het	Dead	523	1
OMP1004	F	ZU	Het	Dead	756	1
OMP1038	F	ZU	Het	Dead	272	1
OMP1039	F	ZU	Het	Dead	499	1
OMP1049	F	ZU	Het	Dead	398	1
OMP1054	F	ZU	Het	Dead	602	1
OMP1105	F	ZU	Het	Dead	438	1
OMP1106	F	ZU	Het	Dead	626	1
OMP1125	F	ZU	Het	Dead	765	1
OMP1127	F	ZU	Het	Dead	884	1
OMP1128	F	ZU	Het	Dead	673	1
OMP1140	F	ZU	Het	Dead	408	1
OMP1231	F	ZU	Het	Dead	569	1
OMP1239	F	ZU	Het	Dead	573	1
OMP1389	F	ZU	Het	Dead	594	1
OMP1390	F	ZU	Het	Dead	478	1
OMP1404	F	ZU	Het	Dead	526	1
OMP1405	F	ZU	Het	Dead	695	1
OMP1508	F	ZU	Het	Dead	406	1
OMP1511	F	ZU	Het	Dead	434	1
OMP0725	F	FU	WT	Dead	430	1
OMP0729	F	FU	WT	Dead	655	1
OMP0747	F	FU	WT	Dead	797	1
OMP0750	F	FU	WT	Dead	497	1
OMP0763	F	FU	WT	Dead	660	1
OMP0766	F	FU	WT	Dead	614	1
OMP0806	F	FU	WT	Dead	812	1
OMP0813	F	FU	WT	Dead	548	1
OMP0814	F	FU	WT	Dead	526	1
OMP0815	F	FU	WT	Dead	889	1
OMP0819	F	FU	WT	Dead	499	1
OMP0821	F	FU	WT	Dead	594	1
OMP1083	F	FU	WT	Dead	415	1
OMP1084	F	FU	WT	Dead	409	1
OMP1111	F	FU	WT	Dead	692	1
OMP1112	F	FU	WT	Dead	670	1
OMP1199	F	FU	WT	Dead	573	1
OMP1200	F	FU	WT	Dead	920	1
OMP1207	F	FU	WT	Dead	788	1
OMP1209	F	FU	WT	Dead	794	1
OMP1244	F	FU	WT	Dead	621	1
OMP1246	F	FU	WT	Dead	729	1
OMP1278	F	FU	WT	Dead	784	1
OMP1279	F	FU	WT	Dead	702	1
OMP1322	F	FU	WT	Dead	762	1
OMP1339	F	FU	WT	Dead	885	1
OMP1447	F	FU	WT	Dead	594	1
OMP1448	F	FU	WT	Dead	516	1
OMP1524	F	FU	WT	Dead	661	1
OMP1525	F	FU	WT	Dead	400	1
OMP0641	F	MU	WT	Dead	550	1
OMP0642	F	MU	WT	Dead	570	1
OMP0706	F	MU	WT	Dead	587	1
OMP0707	F	MU	WT	Dead	684	1
OMP1023	F	MU	WT	Dead	631	1
OMP1031	F	MU	WT	Dead	363	1
OMP1134	F	MU	WT	Dead	798	1
OMP1142	F	MU	WT	Dead	792	1
OMP1143	F	MU	WT	Dead	945	1
OMP1146	F	MU	WT	Dead	852	1
OMP1177	F	MU	WT	Dead	579	1
OMP1194	F	MU	WT	Dead	450	1
OMP1218	F	MU	WT	Dead	641	1
OMP1219	F	MU	WT	Dead	476	1
OMP1284	F	MU	WT	Dead	205	1
OMP1294	F	MU	WT	Dead	591	1
OMP1295	F	MU	WT	Dead	556	1
OMP1296	F	MU	WT	Dead	288	1
OMP1316	F	MU	WT	Dead	627	1
OMP1317	F	MU	WT	Dead	693	1
OMP1476	F	MU	WT	Dead	686	1
OMP1478	F	MU	WT	Dead	612	1
OMP1488	F	MU	WT	Dead	574	1
OMP1489	F	MU	WT	Dead	657	1
OMP1552	F	MU	WT	Dead	396	1
OMP1555	F	MU	WT	Dead	756	1
OMP1576	F	MU	WT	Dead	688	1
OMP1577	F	MU	WT	Dead	579	1
OMP1620	F	MU	WT	Dead	335	1
OMP1628	F	MU	WT	Dead	285	1
OMP0554	F	ZU	WT	Dead	603	1
OMP0559	F	ZU	WT	Dead	714	1
OMP0593	F	ZU	WT	Dead	577	1
OMP0596	F	ZU	WT	Dead	297	1
OMP0678	F	ZU	WT	Dead	401	1
OMP0679	F	ZU	WT	Dead	530	1
OMP0871	F	ZU	WT	REMOVED	372	0
OMP0873	F	ZU	WT	REMOVED	798	0
OMP0980	F	ZU	WT	Dead	568	1
OMP0988	F	ZU	WT	Dead	754	1
OMP1001	F	ZU	WT	Dead	701	1
OMP1002	F	ZU	WT	Dead	452	1
OMP1034	F	ZU	WT	Dead	604	1
OMP1036	F	ZU	WT	Dead	627	1
OMP1051	F	ZU	WT	Dead	640	1
OMP1053	F	ZU	WT	Dead	308	1
OMP1089	F	ZU	WT	Dead	682	1
OMP1090	F	ZU	WT	Dead	724	1
OMP1118	F	ZU	WT	Dead	705	1
OMP1119	F	ZU	WT	Dead	401	1
OMP1126	F	ZU	WT	Dead	496	1
OMP1139	F	ZU	WT	Dead	428	1
OMP1227	F	ZU	WT	Dead	650	1
OMP1229	F	ZU	WT	Dead	796	1
OMP1374	F	ZU	WT	Dead	526	1
OMP1376	F	ZU	WT	Dead	253	1
OMP1402	F	ZU	WT	Dead	750	1
OMP1406	F	ZU	WT	Dead	690	1
OMP1509	F	ZU	WT	Dead	168	1
OMP1510	F	ZU	WT	REMOVED	511	0
OMP0561	M	FU	Het	Dead	766	1
OMP0562	M	FU	Het	Dead	751	1
OMP0620	M	FU	Het	Dead	639	1
OMP0624	M	FU	Het	Dead	701	1
OMP0722	M	FU	Het	Dead	797	1
OMP0724	M	FU	Het	Dead	496	1
OMP0733	M	FU	Het	Dead	396	1
OMP0734	M	FU	Het	Dead	420	1
OMP0804	M	FU	Het	Dead	826	1
OMP0805	M	FU	Het	Dead	585	1
OMP0816	M	FU	Het	Dead	629	1
OMP0818	M	FU	Het	Dead	802	1
OMP0969	M	FU	Het	Dead	601	1
OMP0970	M	FU	Het	Dead	1119	1
OMP1042	M	FU	Het	Dead	632	1
OMP1043	M	FU	Het	Dead	886	1
OMP1179	M	FU	Het	Dead	845	1
OMP1181	M	FU	Het	Dead	454	1
OMP1205	M	FU	Het	Dead	786	1
OMP1206	M	FU	Het	Dead	611	1
OMP1319	M	FU	Het	Dead	532	1
OMP1333	M	FU	Het	Dead	689	1
OMP1334	M	FU	Het	Dead	623	1
OMP1336	M	FU	Het	Dead	862	1
OMP1392	M	FU	Het	Dead	519	1
OMP1393	M	FU	Het	Dead	523	1
OMP1425	M	FU	Het	Dead	784	1
OMP1426	M	FU	Het	Dead	988	1
OMP1512	M	FU	Het	Dead	984	1
OMP1515	M	FU	Het	Dead	595	1
OMP0575	M	MU	Het	Dead	359	1
OMP0578	M	MU	Het	Dead	822	1
OMP0681	M	MU	Het	Dead	772	1
OMP0682	M	MU	Het	Dead	601	1
OMP0702	M	MU	Het	Dead	745	1
OMP0703	M	MU	Het	Dead	590	1
OMP0776	M	MU	Het	Dead	872	1
OMP0780	M	MU	Het	Dead	443	1
OMP0943	M	MU	Het	Dead	813	1
OMP0945	M	MU	Het	Dead	612	1
OMP0952	M	MU	Het	Dead	647	1
OMP0954	M	MU	Het	Dead	791	1
OMP1092	M	MU	Het	Dead	321	1
OMP1094	M	MU	Het	Dead	714	1
OMP1188	M	MU	Het	Dead	728	1
OMP1190	M	MU	Het	Dead	753	1
OMP1306	M	MU	Het	Dead	881	1
OMP1312	M	MU	Het	Dead	765	1
OMP1364	M	MU	Het	Dead	492	1
OMP1366	M	MU	Het	Dead	779	1
OMP1431	M	MU	Het	Dead	991	1
OMP1438	M	MU	Het	Dead	850	1
OMP1439	M	MU	Het	Dead	879	1
OMP1440	M	MU	Het	Dead	831	1
OMP1483	M	MU	Het	Dead	657	1
OMP1484	M	MU	Het	Dead	874	1
OMP1578	M	MU	Het	Dead	822	1
OMP1579	M	MU	Het	Dead	851	1
OMP1593	M	MU	Het	Dead	828	1
OMP1594	M	MU	Het	Dead	629	1
OMP0557	M	ZU	Het	Dead	883	1
OMP0594	M	ZU	Het	Dead	297	1
OMP0666	M	ZU	Het	Dead	664	1
OMP0668	M	ZU	Het	Dead	921	1
OMP0857	M	ZU	Het	Dead	818	1
OMP0868	M	ZU	Het	Dead	948	1
OMP0977	M	ZU	Het	Dead	791	1
OMP0985	M	ZU	Het	Dead	754	1
OMP1062	M	ZU	Het	Dead	689	1
OMP1064	M	ZU	Het	Dead	321	1
OMP1085	M	ZU	Het	Dead	924	1
OMP1086	M	ZU	Het	Dead	721	1
OMP1115	M	ZU	Het	Dead	617	1
OMP1116	M	ZU	Het	Dead	823	1
OMP1122	M	ZU	Het	Dead	944	1
OMP1124	M	ZU	Het	Dead	732	1
OMP1150	M	ZU	Het	Dead	791	1
OMP1152	M	ZU	Het	Dead	749	1
OMP1350	M	ZU	Het	Dead	702	1
OMP1351	M	ZU	Het	Dead	433	1
OMP1372	M	ZU	Het	Dead	790	1
OMP1387	M	ZU	Het	Dead	873	1
OMP1408	M	ZU	Het	Dead	809	1
OMP1411	M	ZU	Het	Dead	867	1
OMP1497	M	ZU	Het	Dead	841	1
OMP1498	M	ZU	Het	Dead	856	1
OMP1504	M	ZU	Het	Dead	654	1
OMP1506	M	ZU	Het	Dead	504	1
OMP1644	M	ZU	Het	Dead	786	1
OMP1646	M	ZU	Het	Dead	507	1
OMP0537	M	FU	WT	Dead	942	1
OMP0541	M	FU	WT	Dead	936	1
OMP0621	M	FU	WT	Dead	869	1
OMP0623	M	FU	WT	Dead	740	1
OMP0723	M	FU	WT	Dead	532	1
OMP0730	M	FU	WT	Dead	691	1
OMP0731	M	FU	WT	Dead	613	1
OMP0732	M	FU	WT	Dead	927	1
OMP0802	M	FU	WT	Dead	875	1
OMP0803	M	FU	WT	Dead	826	1
OMP0808	M	FU	WT	Dead	712	1
OMP0809	M	FU	WT	Dead	479	1
OMP0968	M	FU	WT	Dead	693	1
OMP0971	M	FU	WT	Dead	800	1
OMP1040	M	FU	WT	Dead	542	1
OMP1041	M	FU	WT	Dead	671	1
OMP1182	M	FU	WT	Dead	733	1
OMP1183	M	FU	WT	Dead	878	1
OMP1203	M	FU	WT	Dead	628	1
OMP1204	M	FU	WT	Dead	585	1
OMP1318	M	FU	WT	Dead	890	1
OMP1320	M	FU	WT	Dead	897	1
OMP1335	M	FU	WT	Dead	824	1
OMP1337	M	FU	WT	Dead	838	1
OMP1391	M	FU	WT	Dead	754	1
OMP1394	M	FU	WT	Dead	572	1
OMP1422	M	FU	WT	Dead	830	1
OMP1423	M	FU	WT	Dead	927	1
OMP1513	M	FU	WT	Dead	983	1
OMP1514	M	FU	WT	Dead	388	1
OMP0577	M	MU	WT	Dead	899	1
OMP0579	M	MU	WT	Dead	402	1
OMP0683	M	MU	WT	Dead	800	1
OMP0684	M	MU	WT	Dead	807	1
OMP0700	M	MU	WT	REMOVED	712	0
OMP0701	M	MU	WT	Dead	740	1
OMP0777	M	MU	WT	Dead	942	1
OMP0778	M	MU	WT	Dead	814	1
OMP0942	M	MU	WT	Dead	665	1
OMP0944	M	MU	WT	Dead	437	1
OMP0950	M	MU	WT	Dead	756	1
OMP0951	M	MU	WT	Dead	892	1
OMP1093	M	MU	WT	Dead	788	1
OMP1095	M	MU	WT	Dead	826	1
OMP1187	M	MU	WT	Dead	836	1
OMP1189	M	MU	WT	Dead	692	1
OMP1305	M	MU	WT	Dead	724	1
OMP1307	M	MU	WT	Dead	758	1
OMP1363	M	MU	WT	Dead	768	1
OMP1365	M	MU	WT	Dead	563	1
OMP1430	M	MU	WT	Dead	840	1
OMP1432	M	MU	WT	Dead	819	1
OMP1433	M	MU	WT	Dead	802	1
OMP1441	M	MU	WT	Dead	508	1
OMP1482	M	MU	WT	Dead	522	1
OMP1485	M	MU	WT	Dead	454	1
OMP1571	M	MU	WT	Dead	852	1
OMP1580	M	MU	WT	Dead	848	1
OMP1595	M	MU	WT	Dead	809	1
OMP1596	M	MU	WT	Dead	455	1
OMP0597	M	ZU	WT	Dead	976	1
OMP0598	M	ZU	WT	Dead	677	1
OMP0665	M	ZU	WT	Dead	825	1
OMP0667	M	ZU	WT	Dead	513	1
OMP0858	M	ZU	WT	Dead	904	1
OMP0860	M	ZU	WT	Dead	791	1
OMP0979	M	ZU	WT	Dead	734	1
OMP0986	M	ZU	WT	Dead	433	1
OMP1063	M	ZU	WT	Dead	792	1
OMP1065	M	ZU	WT	Dead	896	1
OMP1087	M	ZU	WT	Dead	394	1
OMP1088	M	ZU	WT	Dead	970	1
OMP1114	M	ZU	WT	REMOVED	932	0
OMP1117	M	ZU	WT	Dead	433	1
OMP1121	M	ZU	WT	Dead	678	1
OMP1123	M	ZU	WT	Dead	521	1
OMP1149	M	ZU	WT	Dead	961	1
OMP1151	M	ZU	WT	Dead	700	1
OMP1348	M	ZU	WT	Dead	611	1
OMP1349	M	ZU	WT	Dead	764	1
OMP1371	M	ZU	WT	Dead	690	1
OMP1388	M	ZU	WT	Dead	1024	1
OMP1410	M	ZU	WT	Dead	426	1
OMP1412	M	ZU	WT	Dead	689	1
OMP1499	M	ZU	WT	Dead	659	1
OMP1500	M	ZU	WT	Dead	575	1
OMP1501	M	ZU	WT	Dead	620	1
OMP1505	M	ZU	WT	Dead	741	1
OMP1645	M	ZU	WT	Dead	784	1
OMP1647	M	ZU	WT	Dead	392	1

## Sheet: Sheet1
Sex	F	F	F	F	F	F	F	F	F	F	F	F	F	F	F	F	F	F	F	F	F	F	F	F	F	F	F	F	F	F	F	F	F	F	F	F	F	F	F	F	F	F	F	F	F	F	F	F	F
Rx	FU	FU	FU	FU	FU	FU	FU	FU	FU	FU	FU	FU	FU	FU	FU	FU	FU	FU	FU	FU	FU	FU	FU	FU	FU	FU	FU	FU	FU	FU	MU	MU	MU	MU	MU	MU	MU	MU	MU	MU	MU	MU	MU	MU	MU	MU	MU	MU	MU
Gene	Het	Het	Het	Het	Het	Het	Het	Het	Het	Het	Het	Het	Het	Het	Het	Het	Het	Het	Het	Het	Het	Het	Het	Het	Het	Het	Het	Het	Het	Het	Het	Het	Het	Het	Het	Het	Het	Het	Het	Het	Het	Het	Het	Het	Het	Het	Het	Het	Het
Status	Dead	Dead	Dead	Dead	REMOVED	Dead	Dead	Dead	Dead	Dead	Dead	Dead	Dead	Dead	Dead	Dead	Dead	Dead	Dead	Dead	Dead	Dead	Dead	Dead	Dead	Dead	Dead	Dead	Dead	Dead	Dead	Dead	Dead	Dead	Dead	Dead	Dead	Dead	Dead	Dead	Dead	Dead	Dead	Dead	Dead	Dead	Dead	Dead	Dead
Age	983	436	810	821	622	349	813	393	527	301	800	549	618	714	485	383	686	565	735	846	715	823	538	554	714	427	571	444	586	657	693	647	684	583	641	778	401	606	578	547	325	545	138	382	297	298	328	381	711
Dead	1	1	1	1	0	1	1	1	1	1	1	1	1	1	1	1	1	1	1	1	1	1	1	1	1	1	1	1	1	1	1	1	1	1	1	1	1	1	1	1	1	1	1	1	1	1	1	1	1
W6	26.3	29.9	27	28	34.1	30.5	31.4	26.6	27.4	23	27.5	27	32.7	30	31.6	27	27.4	31.7	32.8	32.1	24.6	25.4	32.9	31.5	31.8	26.4	33.4	32.7	25.9	27.9	32	29.5	30.6	31.4	28.7	24.3	27	24.3	28.1	24	27.7	30.3		29.3	30	29	28.3	29.7	28.6
Gluc	157	159	178	171			156	142	194		158	146		129	128	144	142	144	170	152	156	143	130	121	114	119	166	176	163	159	158	159	135	159	148	183	152	148	129	159	138	127		151				136	156
Temp			37.8				38				38.3			37.7			36.3		37.8	37.9	37.6	37.7			38						36.1		37.1			37				38.1									37.5
[truncated: 311 more columns]
