# Supplementary material for: Lifespan extension in female mice by early, transient exposure to adult female olfactory cues
Source: eLife. 2022 Dec 16;11:e84060. doi: 10.7554/eLife.84060 (PMC9904757; doi:10.7554/eLife.84060)
Supplement: Figure 2—source data 1. [file elife-84060-fig2-data1.xlsx]

## Sheet: Sheet1
UMN	Group	Sex	Gene	Test_Date	Test_Age	Temp_C	Fore_Mn	Rod_Mn
OMP1198	FU	F	Het	2021-04-12	670	36.3	110.033	63
OMP1323	FU	F	Het	2021-04-26	666	38	84.5667	0
OMP1247	FU	F	Het	2021-04-22	674	37.7	30.4667	0
OMP1202	FU	F	Het	2021-04-12	670	37.8	80.5333	4
OMP0822	FU	F	Het	2021-01-18	671	38.3	88.5	14.3333
OMP0748	FU	F	Het	2020-12-21	669	37.8	78.4333	17.6667
OMP0807	FU	F	Het	2021-01-18	672	38	68.5333	6.66667
OMP1245	FU	F	Het	2021-04-22	674	37.6	96.5333	32.6667
OMP1082	FU	F	Het	2021-03-22	665	37.7	96.4667	5
OMP1405	FU	F	Het	2021-05-10	669	37.9	112.367	0
OMP1208	FU	F	Het	2021-04-12	670	37.9	23.5667	0
OMP1207	FU	F	WT	2021-04-12	670	37.9	78.6333	0
OMP1402	FU	F	WT	2021-05-10	669	38	92.3	0
OMP1111	FU	F	WT	2021-03-31	669	35.8	75.5333	20
OMP1278	FU	F	WT	2021-04-22	669	38.2	116.7	2
OMP1246	FU	F	WT	2021-04-22	674	38	119.4	0
OMP0806	FU	F	WT	2021-01-18	672	37.7	71.8	4.33333
OMP0815	FU	F	WT	2021-01-18	671	38.2	87.0333	65
OMP0750	FU	F	WT	2020-12-21	669	37.8	90.6667	7
OMP0763	FU	F	WT	2020-12-21	667	37	131	9.33333
OMP1279	FU	F	WT	2021-04-22	669	37.7	98.6333	4.33333
OMP0747	FU	F	WT	2020-12-21	669	37.9	95.1667	3.66667
OMP1339	FU	F	WT	2021-04-26	665	37.8	77.6333	5
OMP1406	FU	F	WT	2021-05-10	669	37.1	62.1	0
OMP1112	FU	F	WT	2021-03-31	669	36.3	63.9667
OMP1322	FU	F	WT	2021-04-26	666	36.8	47.7667	2
OMP1209	FU	F	WT	2021-04-12	670	37.5	82.2667	10
OMP1200	FU	F	WT	2021-04-12	670	37.9	117.833	0
OMP1574	MU	F	Het	2021-06-24	673	37.5	85.6667	8.66667
OMP1477	MU	F	Het	2021-05-24	666	38.1	84.9333	0
OMP1480	MU	F	Het	2021-05-24	666	38.4	105.667	22.3333
OMP1147	MU	F	Het	2021-03-31	668	38.1	82.6333	0
OMP1030	MU	F	Het	2021-03-08	667	37	58.8333	10
OMP1550	MU	F	Het	2021-06-14	665	37.6	63.8	4.33333
OMP0704	MU	F	Het	2020-12-10	673	37.1	70.5	2
OMP1314	MU	F	Het	2021-04-26	669	37.5	88.9	0
OMP0643	MU	F	Het	2020-11-12	670	36.1	64.3	2.33333
OMP1576	MU	F	WT	2021-06-24	673	35.2	46.9	0
OMP1146	MU	F	WT	2021-03-31	668	38.2	91.4	0
OMP1555	MU	F	WT	2021-06-14	665	37.4	74.8333	0
OMP1142	MU	F	WT	2021-03-31	668	37.4	77.9	0
OMP1134	MU	F	WT	2021-03-31	668	37.5	93.8667	5.66667
OMP0707	MU	F	WT	2020-12-10	673	36	95	6
OMP1476	MU	F	WT	2021-05-24	666	36.3	98.0667	9
OMP1317	MU	F	WT	2021-04-26	669	37.3	84.9	0
OMP1128	ZU	F	Het	2021-04-08	674	37.6	90.6333	6.33333
OMP0862	ZU	F	Het	2021-01-28	675	34.4	91.6	46.3333
OMP0553	ZU	F	Het	2020-10-12	670	37.2	68.9667	16.3333
OMP1125	ZU	F	Het	2021-04-08	674	36.6	87.7667	5.33333
OMP0676	ZU	F	Het	2020-11-23	667	35.9	84.7333	32
OMP0989	ZU	F	Het	2021-03-04	673	37.7	124.367	6.66667
OMP1127	ZU	F	Het	2021-04-08	676	37.5	94.8333	2
OMP1004	ZU	F	Het	2021-03-04	670	37.9	81.7	0
OMP1089	ZU	F	WT	2021-03-31	672	32.7	87.6	0
OMP0559	ZU	F	WT	2020-10-12	670	36.6	125.1	13
OMP1229	ZU	F	WT	2021-04-22	674	37.8	122.367	5.33333
OMP1090	ZU	F	WT	2021-03-31	672	36.2	75.3667	5.66667
OMP0988	ZU	F	WT	2021-03-04	673	37.7	111.967	3.33333
OMP1118	ZU	F	WT	2021-04-08	676	37.2	76.9333	0
OMP1001	ZU	F	WT	2021-03-04	670	36.2	101.7	0
OMP0873	ZU	F	WT	2021-01-28	674	37.3	55.9667	5.33333
OMP0562	FU	M	Het	2020-10-01	670	37.5	85.3	2
OMP1205	FU	M	Het	2021-04-15	673	37.6	107.767	4.33333
OMP1336	FU	M	Het	2021-04-29	668	37.8	115.933	2
OMP0818	FU	M	Het	2021-01-21	674	37.8	93.4667	0
OMP0624	FU	M	Het	2020-11-05	674	37	97.4667	0
OMP1179	FU	M	Het	2021-04-15	674	37.1	104.367	10.3333
OMP0970	FU	M	Het	2021-03-01	673	37.5	102.067	4
OMP0804	FU	M	Het	2021-01-21	675	37.6	70.8	7.33333
OMP1426	FU	M	Het	2021-05-17	669	38.1	121.867	0
OMP1512	FU	M	Het	2021-06-07	665	36.2	82.3	2.33333
OMP0561	FU	M	Het	2020-10-01	670	38.3	110.1	0
OMP0722	FU	M	Het	2020-12-07	667	37.1	56.3333	19.6667
OMP1484	FU	M	Het	2021-05-27	667	37.1	91.7667	20.3333
OMP1333	FU	M	Het	2021-04-29	668	37.4	111.167	3.66667
OMP1425	FU	M	Het	2021-05-17	669	37	93.1	2.66667
OMP1043	FU	M	Het	2021-03-15	671	36.7	66.0667	0
OMP0621	FU	M	WT	2020-11-05	674	37.2	66.0333	4.66667
OMP0623	FU	M	WT	2020-11-05	674	37.2	78.8	5
OMP0808	FU	M	WT	2021-01-21	674	37	96.1333	31.3333
OMP1337	FU	M	WT	2021-04-29	668	37.5	99.9333	9.66667
OMP1391	FU	M	WT	2021-05-13	673	37.1	69.3333	0
OMP1320	FU	M	WT	2021-04-29	669	38	107.567	0
OMP1422	FU	M	WT	2021-05-17	669	36.6	134.6	0
OMP1423	FU	M	WT	2021-05-17	669	37.3	108.767	12
OMP1318	FU	M	WT	2021-04-29	669	37.7	119.8	0
OMP1183	FU	M	WT	2021-04-15	674	37.1	111.767	7.33333
OMP1182	FU	M	WT	2021-04-15	674	37.5	88.7	2
OMP0732	FU	M	WT	2020-12-07	665	37.7	96.5	78.3333
OMP1513	FU	M	WT	2021-06-07	665	36.2	110.6	2
OMP0541	FU	M	WT	2020-10-01	672	37.6	108.533	0
OMP1335	FU	M	WT	2021-04-29	668	37.7	100.333	4.33333
OMP0537	FU	M	WT	2020-10-01	672	38	78.0333	0
OMP0971	FU	M	WT	2021-03-01	673	38.1	125.1	7.66667
OMP0802	FU	M	WT	2021-01-21	675	37.7	52.1667	4
OMP0803	FU	M	WT	2021-01-21	675	37.3	48.7333	42
OMP0730	FU	M	WT	2020-12-07	665	35.4	78.8	10
OMP0968	FU	M	WT	2021-03-01	673	36.7	93.5333	18
OMP1578	MU	M	Het	2021-06-21	669	37.3	128.733	4.33333
OMP0681	MU	M	Het	2020-11-30	671	36.6	54.4667	0
OMP0943	MU	M	Het	2021-02-15	668	36.8	86.4333	0
OMP0776	MU	M	Het	2020-12-30	671	37.4	89.1667	1.66667
OMP1579	MU	M	Het	2021-06-21	669	37.4	115.367	7.66667
OMP0578	MU	M	Het	2020-10-05	667	37.1	104.667	32
OMP0702	MU	M	Het	2020-12-07	670	35.9	99.0333	3.33333
OMP1440	MU	M	Het	2021-05-17	666	37.4	101.133	0
OMP1438	MU	M	Het	2021-05-17	666	37.8	93.7	2
OMP0954	MU	M	Het	2021-02-15	668	38	77.4667	5
OMP1431	MU	M	Het	2021-05-17	664	37.4	77.6667	0
OMP1306	MU	M	Het	2021-04-29	673	37.1	102.8	0
OMP1188	MU	M	Het	2021-04-15	674	33	78.1	43.3333
OMP1190	MU	M	Het	2021-04-15	674	36.1	83.1667	20
OMP1439	MU	M	Het	2021-05-17	666	37.6	76.9	7.66667
OMP1366	MU	M	Het	2021-05-03	667	37.9	85.8667	5.33333
OMP1094	MU	M	Het	2021-03-29	669	37.9	106.4	0
OMP1595	MU	M	WT	2021-07-01	668	36.2	133.3	10
OMP1307	MU	M	WT	2021-04-29	673	37.6	111.967	2.33333
OMP1363	MU	M	WT	2021-05-03	667	37.2	72.7	14
OMP0950	MU	M	WT	2021-02-15	668	36.7	75.6	1.66667
OMP1432	MU	M	WT	2021-05-17	664	37.4	95.4	0
OMP0683	MU	M	WT	2020-11-30	671	36.5	11.1	0
OMP1095	MU	M	WT	2021-03-29	669	37.6	120.3	3.33333
OMP1093	MU	M	WT	2021-03-29	669	37.8	114.667	3.33333
OMP1571	MU	M	WT	2021-06-21	670	37.2	96	18
OMP0777	MU	M	WT	2020-12-30	671	37.3	65.1	0
OMP1187	MU	M	WT	2021-04-15	674	37.3	94.4	0
OMP0778	MU	M	WT	2020-12-30	671	37.4	70.4333	5
OMP1596	MU	M	WT	2021-07-01	668	36.2	128.533	11.6667
OMP1433	MU	M	WT	2021-05-17	664	37.9	103.567	0
OMP1305	MU	M	WT	2021-04-29	673	37.1	106.867	72
OMP1189	MU	M	WT	2021-04-15	674	35.3	89.6667	9.33333
OMP0701	MU	M	WT	2020-12-07	670	37.5	83	0
OMP0700	MU	M	WT	2020-12-07	670	35.1	97.5	14.6667
OMP0951	MU	M	WT	2021-02-15	668	38	97.1333	0
OMP0577	MU	M	WT	2020-10-05	667	38.3	109.367	27.6667
OMP1580	MU	M	WT	2021-06-21	669	38.6	109.1	6.66667
OMP1430	MU	M	WT	2021-05-17	664	38	129.067	0
OMP1116	ZU	M	Het	2021-04-05	673	37.4	77.8667	4.33333
OMP0977	ZU	M	Het	2021-03-01	671	37.4	60.1667	0
OMP1372	ZU	M	Het	2021-05-03	666	37.4	91	0
OMP0857	ZU	M	Het	2021-01-25	672	36.6	59.9667	3.33333
OMP1124	ZU	M	Het	2021-04-05	671	37.4	97.5333	2
OMP1387	ZU	M	Het	2021-05-03	664	37.8	66	2.33333
OMP1150	ZU	M	Het	2021-04-05	668	37.7	110.767	24
OMP1497	ZU	M	Het	2021-06-01	667	36.1	58.6667	0
OMP1411	ZU	M	Het	2021-05-13	668	36.5	84.5333	0
OMP1122	ZU	M	Het	2021-04-05	671	37.5	71.5667	1.66667
OMP1085	ZU	M	Het	2021-03-29	670	37.5	98.4	0
OMP0557	ZU	M	Het	2020-10-15	673	36.5	129.3	25
OMP1152	ZU	M	Het	2021-04-05	668	38.2	134.567	2.66667
OMP1408	ZU	M	Het	2021-05-13	668	36.1	136.167	0
OMP1086	ZU	M	Het	2021-03-29	670	37.7	74.8333	0
OMP1350	ZU	M	Het	2021-05-03	667	37.2	90.0667	4.66667
OMP1498	ZU	M	Het	2021-06-01	667	37.7	102.433	11
OMP1062	ZU	M	Het	2021-03-25	672	35.3	111.6	24.3333
OMP0668	ZU	M	Het	2020-11-19	667	37.5	106.433	2
OMP0868	ZU	M	Het	2021-01-25	671	37.8	92.2	8.33333
OMP0985	ZU	M	Het	2021-03-01	670	37.9	81.6667	8.66667
OMP1644	ZU	M	Het	2021-07-15	668	37.6	134.6	0
OMP1151	ZU	M	WT	2021-04-05	668	37.5	100.1	2
OMP1645	ZU	M	WT	2021-07-15	668	38.7	103.6	0
OMP1371	ZU	M	WT	2021-05-03	666	35.1	121.667	0
OMP1412	ZU	M	WT	2021-05-13	668	35.2	88.5333	3
OMP1388	ZU	M	WT	2021-05-03	664	37.8	110.233	5.33333
OMP1088	ZU	M	WT	2021-03-29	670	37.6	108.333	0
OMP0597	ZU	M	WT	2020-10-15	671	37.5	117.5	3.33333
OMP1505	ZU	M	WT	2021-06-01	666	37.8	105.7	0
OMP0858	ZU	M	WT	2021-01-25	672	35.9	103.533	2
OMP1065	ZU	M	WT	2021-03-25	672	37.9	168.433	94.3333
OMP0979	ZU	M	WT	2021-03-01	671	37	13.9333	0
OMP0860	ZU	M	WT	2021-01-25	672	36.9	132.567	6.66667
OMP0665	ZU	M	WT	2020-11-19	667	37.5	81.9	17
OMP1063	ZU	M	WT	2021-03-25	672	34.3	83	0
OMP1114	ZU	M	WT	2021-04-05	673	37.6	116.3	4.33333
OMP1349	ZU	M	WT	2021-05-03	667	38	90.6333	0
OMP1149	ZU	M	WT	2021-04-05	668	37.8	85.3	0
OMP1121	ZU	M	WT	2021-04-05	671	34	74.8	10

## Sheet: Sheet2
UMN	OMP1198	OMP1323	OMP1247	OMP1202	OMP0822	OMP0748	OMP0807	OMP1245	OMP1082	OMP1405	OMP1208	OMP1207	OMP1402	OMP1111	OMP1278	OMP1246	OMP0806	OMP0815	OMP0750	OMP0763	OMP1279	OMP0747	OMP1339	OMP1406	OMP1112	OMP1322	OMP1209	OMP1200	OMP1574	OMP1477	OMP1480	OMP1147	OMP1030	OMP1550	OMP0704	OMP1314	OMP0643	OMP1576	OMP1146	OMP1555	OMP1142	OMP1134	OMP0707	OMP1476	OMP1317	OMP1128	OMP0862	OMP0553	OMP1125
Group	FU	FU	FU	FU	FU	FU	FU	FU	FU	FU	FU	FU	FU	FU	FU	FU	FU	FU	FU	FU	FU	FU	FU	FU	FU	FU	FU	FU	MU	MU	MU	MU	MU	MU	MU	MU	MU	MU	MU	MU	MU	MU	MU	MU	MU	ZU	ZU	ZU	ZU
Sex	F	F	F	F	F	F	F	F	F	F	F	F	F	F	F	F	F	F	F	F	F	F	F	F	F	F	F	F	F	F	F	F	F	F	F	F	F	F	F	F	F	F	F	F	F	F	F	F	F
Gene	Het	Het	Het	Het	Het	Het	Het	Het	Het	Het	Het	WT	WT	WT	WT	WT	WT	WT	WT	WT	WT	WT	WT	WT	WT	WT	WT	WT	Het	Het	Het	Het	Het	Het	Het	Het	Het	WT	WT	WT	WT	WT	WT	WT	WT	Het	Het	Het	Het
Test_Date	2021-04-12	2021-04-26	2021-04-22	2021-04-12	2021-01-18	2020-12-21	2021-01-18	2021-04-22	2021-03-22	2021-05-10	2021-04-12	2021-04-12	2021-05-10	2021-03-31	2021-04-22	2021-04-22	2021-01-18	2021-01-18	2020-12-21	2020-12-21	2021-04-22	2020-12-21	2021-04-26	2021-05-10	2021-03-31	2021-04-26	2021-04-12	2021-04-12	2021-06-24	2021-05-24	2021-05-24	2021-03-31	2021-03-08	2021-06-14	2020-12-10	2021-04-26	2020-11-12	2021-06-24	2021-03-31	2021-06-14	2021-03-31	2021-03-31	2020-12-10	2021-05-24	2021-04-26	2021-04-08	2021-01-28	2020-10-12	2021-04-08
Test_Age	670	666	674	670	671	669	672	674	665	669	670	670	669	669	669	674	672	671	669	667	669	669	665	669	669	666	670	670	673	666	666	668	667	665	673	669	670	673	668	665	668	668	673	666	669	674	675	670	674
Weight	25.7	28.4	27.7	34	28.9	33.5	36.7	32	41.4	36.5	28.5	39.4	31.2	31.7	33	30.1	32.5	28.6	32.3	31.1	32.2	31.4	39.3	31	27.9	24	34.3	33.6	35.5	30.2	32.3	26.7	26	32.7	45.7	33.3	31.8	35.4	28.1	33.3	31.7	31.7	31.4	38.5	42.4	34.4	23.2	31.8	30.4
Temp_C	36.3	38	37.7	37.8	38.3	37.8	38	37.6	37.7	37.9	37.9	37.9	38	35.8	38.2	38	37.7	38.2	37.8	37	37.7	37.9	37.8	37.1	36.3	36.8	37.5	37.9	37.5	38.1	38.4	38.1	37	37.6	37.1	37.5	36.1	35.2	38.2	37.4	37.4	37.5	36	36.3	37.3	37.6	34.4	37.2	36.6
Fore_Mn	110.033	84.5667	30.4667	80.5333	88.5	78.4333	68.5333	96.5333	96.4667	112.367	23.5667	78.6333	92.3	75.5333	116.7	119.4	71.8	87.0333	90.6667	131	98.6333	95.1667	77.6333	62.1	63.9667	47.7667	82.2667	117.833	85.6667	84.9333	105.667	82.6333	58.8333	63.8	70.5	88.9	64.3	46.9	91.4	74.8333	77.9	93.8667	95	98.0667	84.9	90.6333	91.6	68.9667	87.7667
Fore_Max	141.1	93.1	42.3	93.7	123.9	86.8	73.6	121.6	128.9	138.9	26.2	102.2	164.5	101.6	135.9	135.4	81.7	105.7	106.9	175.9	101.1	149	94.8	81.1	77.7	51.9	96.5	126.8	103.3	117.7	136	109.6	72.5	113.7	76	98.2	82.2	64	122.2	96.6	90.2	129.7	160.5	122.8	113.6	127.9	120.6	100.5	104
AllGrip_Mn	137.6	111	77.1	90.1	118.067	162.2	149.067	173.667	131.567	134.367	88.3667	156.533	144.533	171.567	160.567	122.767	103.567	172.3	124.733	149.833	149.467	163.6	151.567	82.6333	80.9333	102.2	182.033	141.833	142.233	145.6	151.033	131.367	103.367	145.633	173.1	117.5	138.633	69.4667	161.667	155.367	139.7	133.067	99.7333	190.967	134.6	126.767	154.233	145.433	123.767
AllGrip_Max	149	148.5	102.2	100	132.6	203.9	170.2	240.5	148.5	183.3	106.3	177.7	147.4	180.5	178.4	137.6	130.3	180.5	148.6	182.2	195.4	215.4	228.5	100	97.1	118.2	195.9	167.9	187.9	166.8	181.1	169.6	123.3	201.6	208.5	152.6	148.5	70.8	164	174.2	157.6	140.5	127.9	230.2	156.5	146.2	204.5	155.9	182.2
Rod_Mn	63	0	0	4	14.3333	17.6667	6.66667	32.6667	5	0	0	0	0	20	2	0	4.33333	65	7	9.33333	4.33333	3.66667	5	0		2	10	0	8.66667	0	22.3333	0	10	4.33333	2	0	2.33333	0	0	0	0	5.66667	6	9	0	6.33333	46.3333	16.3333	5.33333
Rod_Mx	74	0	0	6	22	25	7	51	15	0	0	0	0	29	6	0	8	158	13	12	7	11	9	0	0	6	24	0	18	0	36	0	13	7	6	0	7	0	0	0	0	11	6	18	0	7	76	21	10
Comment		Refused to run	Refused to run						large throat mass	cage trans before T/grip testing, mass right shoulder, Refused to run	Refused to run	Refused to run	cage trans beforeT/grip testing, Refused to run			Refused to run								cage trans before T/grip testing,Refused to run	rectal prolapse, euthanized			Refused to run		Refused to run		Refused to run	Refused to run		Genital mass	Refused to run		Refused to grasp, Refused to run	Refused to run	Refused to run	Refused to run		Side mass		Refused to run
[truncated: 128 more columns]
