# Supplementary material for: Lifespan extension in female mice by early, transient exposure to adult female olfactory cues
Source: eLife. 2022 Dec 16;11:e84060. doi: 10.7554/eLife.84060 (PMC9904757; doi:10.7554/eLife.84060)
Supplement: Figure 2—source data 2. [file elife-84060-fig2-data2.xlsx]

## Sheet: RAM
UMN	Sex	Rx	Gene	Gluc
OMP0727	F	FU	Het	157
OMP0728	F	FU	Het	159
OMP0748	F	FU	Het	178
OMP0751	F	FU	Het	171
OMP0764	F	FU	Het
OMP0765	F	FU	Het
OMP0807	F	FU	Het	156
OMP0810	F	FU	Het	142
OMP0811	F	FU	Het	194
OMP0812	F	FU	Het
OMP0822	F	FU	Het	158
OMP0823	F	FU	Het	146
OMP1081	F	FU	Het
OMP1082	F	FU	Het	129
OMP1110	F	FU	Het	128
OMP1113	F	FU	Het	144
OMP1198	F	FU	Het	142
OMP1201	F	FU	Het	144
OMP1202	F	FU	Het	170
OMP1208	F	FU	Het	152
OMP1245	F	FU	Het	156
OMP1247	F	FU	Het	143
OMP1276	F	FU	Het	130
OMP1277	F	FU	Het	121
OMP1323	F	FU	Het	114
OMP1338	F	FU	Het	119
OMP1449	F	FU	Het	166
OMP1452	F	FU	Het	176
OMP1520	F	FU	Het	163
OMP1522	F	FU	Het	159
OMP0643	F	MU	Het	158
OMP0644	F	MU	Het	159
OMP0704	F	MU	Het	135
OMP0705	F	MU	Het	159
OMP1022	F	MU	Het	148
OMP1030	F	MU	Het	183
OMP1131	F	MU	Het	152
OMP1132	F	MU	Het	148
OMP1144	F	MU	Het	129
OMP1147	F	MU	Het	159
OMP1191	F	MU	Het	138
OMP1193	F	MU	Het	127
OMP1217	F	MU	Het
OMP1220	F	MU	Het	151
OMP1282	F	MU	Het
OMP1283	F	MU	Het
OMP1285	F	MU	Het
OMP1286	F	MU	Het	136
OMP1314	F	MU	Het	156
OMP1315	F	MU	Het
OMP1477	F	MU	Het	130
OMP1479	F	MU	Het	154
OMP1480	F	MU	Het	170
OMP1481	F	MU	Het	137
OMP1550	F	MU	Het	155
OMP1554	F	MU	Het	140
OMP1574	F	MU	Het	181
OMP1575	F	MU	Het	194
OMP1619	F	MU	Het	173
OMP1627	F	MU	Het	160
OMP0553	F	ZU	Het	190
OMP0591	F	ZU	Het	152
OMP0592	F	ZU	Het
OMP0595	F	ZU	Het	129
OMP0676	F	ZU	Het	160
OMP0677	F	ZU	Het	172
OMP0861	F	ZU	Het	170
OMP0862	F	ZU	Het	134
OMP0982	F	ZU	Het	132
OMP0989	F	ZU	Het	125
OMP0999	F	ZU	Het	143
OMP1004	F	ZU	Het	179
OMP1038	F	ZU	Het
OMP1039	F	ZU	Het	134
OMP1049	F	ZU	Het	154
OMP1054	F	ZU	Het	142
OMP1105	F	ZU	Het	156
OMP1106	F	ZU	Het	146
OMP1125	F	ZU	Het	132
OMP1127	F	ZU	Het	176
OMP1128	F	ZU	Het	149
OMP1140	F	ZU	Het	153
OMP1231	F	ZU	Het	162
OMP1239	F	ZU	Het	151
OMP1389	F	ZU	Het	170
OMP1390	F	ZU	Het	154
OMP1404	F	ZU	Het	144
OMP1405	F	ZU	Het	132
OMP1508	F	ZU	Het	129
OMP1511	F	ZU	Het	134
OMP0725	F	FU	WT	155
OMP0729	F	FU	WT	142
OMP0747	F	FU	WT	174
OMP0750	F	FU	WT	148
OMP0763	F	FU	WT	173
OMP0766	F	FU	WT	156
OMP0806	F	FU	WT	142
OMP0813	F	FU	WT	148
OMP0814	F	FU	WT	154
OMP0815	F	FU	WT	162
OMP0819	F	FU	WT	145
OMP0821	F	FU	WT	144
OMP1083	F	FU	WT	128
OMP1084	F	FU	WT	153
OMP1111	F	FU	WT	143
OMP1112	F	FU	WT	163
OMP1199	F	FU	WT	151
OMP1200	F	FU	WT	115
OMP1207	F	FU	WT	138
OMP1209	F	FU	WT	141
OMP1244	F	FU	WT	132
OMP1246	F	FU	WT	149
OMP1278	F	FU	WT	151
OMP1279	F	FU	WT	135
OMP1322	F	FU	WT	137
OMP1339	F	FU	WT	165
OMP1447	F	FU	WT	152
OMP1448	F	FU	WT	171
OMP1524	F	FU	WT	168
OMP1525	F	FU	WT	114
OMP0641	F	MU	WT	162
OMP0642	F	MU	WT	151
OMP0706	F	MU	WT	150
OMP0707	F	MU	WT	147
OMP1023	F	MU	WT	152
OMP1031	F	MU	WT
OMP1134	F	MU	WT	122
OMP1142	F	MU	WT	140
OMP1143	F	MU	WT	120
OMP1146	F	MU	WT	157
OMP1177	F	MU	WT
OMP1194	F	MU	WT	161
OMP1218	F	MU	WT	149
OMP1219	F	MU	WT	155
OMP1284	F	MU	WT	122
OMP1294	F	MU	WT	145
OMP1295	F	MU	WT	157
OMP1296	F	MU	WT
OMP1316	F	MU	WT	150
OMP1317	F	MU	WT	145
OMP1476	F	MU	WT	153
OMP1478	F	MU	WT	153
OMP1488	F	MU	WT	153
OMP1489	F	MU	WT	153
OMP1552	F	MU	WT	120
OMP1555	F	MU	WT	163
OMP1576	F	MU	WT	169
OMP1577	F	MU	WT	170
OMP1620	F	MU	WT
OMP1628	F	MU	WT
OMP0554	F	ZU	WT	181
OMP0559	F	ZU	WT	163
OMP0593	F	ZU	WT	154
OMP0596	F	ZU	WT
OMP0678	F	ZU	WT	170
OMP0679	F	ZU	WT	156
OMP0871	F	ZU	WT	139
OMP0873	F	ZU	WT	158
OMP0980	F	ZU	WT	137
OMP0988	F	ZU	WT	143
OMP1001	F	ZU	WT	143
OMP1002	F	ZU	WT	122
OMP1034	F	ZU	WT	143
OMP1036	F	ZU	WT	155
OMP1051	F	ZU	WT	151
OMP1053	F	ZU	WT
OMP1089	F	ZU	WT	174
OMP1090	F	ZU	WT	139
OMP1118	F	ZU	WT	141
OMP1119	F	ZU	WT	139
OMP1126	F	ZU	WT	152
OMP1139	F	ZU	WT	135
OMP1227	F	ZU	WT	151
OMP1229	F	ZU	WT	165
OMP1374	F	ZU	WT	86
OMP1376	F	ZU	WT
OMP1402	F	ZU	WT	134
OMP1406	F	ZU	WT	164
OMP1509	F	ZU	WT
OMP1510	F	ZU	WT	144
OMP0561	M	FU	Het	185
OMP0562	M	FU	Het	188
OMP0620	M	FU	Het	143
OMP0624	M	FU	Het	163
OMP0722	M	FU	Het	182
OMP0724	M	FU	Het	170
OMP0733	M	FU	Het	197
OMP0734	M	FU	Het	179
OMP0804	M	FU	Het	160
OMP0805	M	FU	Het	151
OMP0816	M	FU	Het	158
OMP0818	M	FU	Het	173
OMP0969	M	FU	Het	147
OMP0970	M	FU	Het	176
OMP1042	M	FU	Het	175
OMP1043	M	FU	Het	156
OMP1179	M	FU	Het	144
OMP1181	M	FU	Het	147
OMP1205	M	FU	Het	173
OMP1206	M	FU	Het	180
OMP1319	M	FU	Het	151
OMP1333	M	FU	Het	177
OMP1334	M	FU	Het	144
OMP1336	M	FU	Het	170
OMP1392	M	FU	Het	192
OMP1393	M	FU	Het	177
OMP1425	M	FU	Het	153
OMP1426	M	FU	Het	177
OMP1512	M	FU	Het	184
OMP1515	M	FU	Het	175
OMP0575	M	MU	Het
OMP0578	M	MU	Het	178
OMP0681	M	MU	Het	176
OMP0682	M	MU	Het	166
OMP0702	M	MU	Het	190
OMP0703	M	MU	Het	169
OMP0776	M	MU	Het	150
OMP0780	M	MU	Het	152
OMP0943	M	MU	Het	179
OMP0945	M	MU	Het	174
OMP0952	M	MU	Het	184
OMP0954	M	MU	Het	211
OMP1092	M	MU	Het
OMP1094	M	MU	Het	149
OMP1188	M	MU	Het	149
OMP1190	M	MU	Het	190
OMP1306	M	MU	Het	151
OMP1312	M	MU	Het	173
OMP1364	M	MU	Het	131
OMP1366	M	MU	Het	144
OMP1431	M	MU	Het	191
OMP1438	M	MU	Het	245
OMP1439	M	MU	Het	156
OMP1440	M	MU	Het	157
OMP1483	M	MU	Het	184
OMP1484	M	MU	Het	166
OMP1578	M	MU	Het	148
OMP1579	M	MU	Het	163
OMP1593	M	MU	Het	214
OMP1594	M	MU	Het	155
OMP0557	M	ZU	Het	130
OMP0594	M	ZU	Het
OMP0666	M	ZU	Het	186
OMP0668	M	ZU	Het	156
OMP0857	M	ZU	Het	150
OMP0868	M	ZU	Het	171
OMP0977	M	ZU	Het	147
OMP0985	M	ZU	Het	176
OMP1062	M	ZU	Het	135
OMP1064	M	ZU	Het
OMP1085	M	ZU	Het	173
OMP1086	M	ZU	Het	159
OMP1115	M	ZU	Het	159
OMP1116	M	ZU	Het	158
OMP1122	M	ZU	Het	164
OMP1124	M	ZU	Het	176
OMP1150	M	ZU	Het	190
OMP1152	M	ZU	Het	152
OMP1350	M	ZU	Het	156
OMP1351	M	ZU	Het	154
OMP1372	M	ZU	Het	158
OMP1387	M	ZU	Het	161
OMP1408	M	ZU	Het	144
OMP1411	M	ZU	Het	131
OMP1497	M	ZU	Het	151
OMP1498	M	ZU	Het	152
OMP1504	M	ZU	Het	161
OMP1506	M	ZU	Het	157
OMP1644	M	ZU	Het	153
OMP1646	M	ZU	Het	147
OMP0537	M	FU	WT	176
OMP0541	M	FU	WT	200
OMP0621	M	FU	WT	171
OMP0623	M	FU	WT	163
OMP0723	M	FU	WT	168
OMP0730	M	FU	WT
OMP0731	M	FU	WT	153
OMP0732	M	FU	WT	153
OMP0802	M	FU	WT	209
OMP0803	M	FU	WT	154
OMP0808	M	FU	WT	166
OMP0809	M	FU	WT	138
OMP0968	M	FU	WT	153
OMP0971	M	FU	WT	152
OMP1040	M	FU	WT	117
OMP1041	M	FU	WT	161
OMP1182	M	FU	WT	190
OMP1183	M	FU	WT	162
OMP1203	M	FU	WT	132
OMP1204	M	FU	WT	172
OMP1318	M	FU	WT	142
OMP1320	M	FU	WT	132
OMP1335	M	FU	WT	149
OMP1337	M	FU	WT	165
OMP1391	M	FU	WT	162
OMP1394	M	FU	WT	157
OMP1422	M	FU	WT	182
OMP1423	M	FU	WT	168
OMP1513	M	FU	WT	159
OMP1514	M	FU	WT	186
OMP0577	M	MU	WT	165
OMP0579	M	MU	WT	108
OMP0683	M	MU	WT	165
OMP0684	M	MU	WT	169
OMP0700	M	MU	WT	174
OMP0701	M	MU	WT	181
OMP0777	M	MU	WT	157
OMP0778	M	MU	WT	153
OMP0942	M	MU	WT	149
OMP0944	M	MU	WT	166
OMP0950	M	MU	WT	156
OMP0951	M	MU	WT	181
OMP1093	M	MU	WT	174
OMP1095	M	MU	WT	173
OMP1187	M	MU	WT	159
OMP1189	M	MU	WT	175
OMP1305	M	MU	WT	139
OMP1307	M	MU	WT	138
OMP1363	M	MU	WT	141
OMP1365	M	MU	WT	129
OMP1430	M	MU	WT	194
OMP1432	M	MU	WT	154
OMP1433	M	MU	WT	161
OMP1441	M	MU	WT	167
OMP1482	M	MU	WT	154
OMP1485	M	MU	WT	148
OMP1571	M	MU	WT	183
OMP1580	M	MU	WT	190
OMP1595	M	MU	WT	145
OMP1596	M	MU	WT	152
OMP0597	M	ZU	WT	164
OMP0598	M	ZU	WT	157
OMP0665	M	ZU	WT	161
OMP0667	M	ZU	WT	144
OMP0858	M	ZU	WT	149
OMP0860	M	ZU	WT	153
OMP0979	M	ZU	WT	104
OMP0986	M	ZU	WT	144
OMP1063	M	ZU	WT	165
OMP1065	M	ZU	WT	136
OMP1087	M	ZU	WT	152
OMP1088	M	ZU	WT	152
OMP1114	M	ZU	WT	135
OMP1117	M	ZU	WT	120
OMP1121	M	ZU	WT	225
OMP1123	M	ZU	WT	164
OMP1149	M	ZU	WT	140
OMP1151	M	ZU	WT	131
OMP1348	M	ZU	WT	176
OMP1349	M	ZU	WT	140
OMP1371	M	ZU	WT	145
OMP1388	M	ZU	WT	141
OMP1410	M	ZU	WT	132
OMP1412	M	ZU	WT	164
OMP1499	M	ZU	WT	151
OMP1500	M	ZU	WT	141
OMP1501	M	ZU	WT	167
OMP1505	M	ZU	WT	147
OMP1645	M	ZU	WT	173
OMP1647	M	ZU	WT	181

## Sheet: Sheet1
Sex	F	F	F	F	F	F	F	F	F	F	F	F	F	F	F	F	F	F	F	F	F	F	F	F	F	F	F	F	F	F	F	F	F	F	F	F	F	F	F	F	F	F	F	F	F	F	F	F	F
Rx	FU	FU	FU	FU	FU	FU	FU	FU	FU	FU	FU	FU	FU	FU	FU	FU	FU	FU	FU	FU	FU	FU	FU	FU	FU	FU	FU	FU	FU	FU	MU	MU	MU	MU	MU	MU	MU	MU	MU	MU	MU	MU	MU	MU	MU	MU	MU	MU	MU
Gene	Het	Het	Het	Het	Het	Het	Het	Het	Het	Het	Het	Het	Het	Het	Het	Het	Het	Het	Het	Het	Het	Het	Het	Het	Het	Het	Het	Het	Het	Het	Het	Het	Het	Het	Het	Het	Het	Het	Het	Het	Het	Het	Het	Het	Het	Het	Het	Het	Het
Status	Dead	Dead	Dead	Dead	REMOVED	Dead	Dead	Dead	Dead	Dead	Dead	Dead	Dead	Dead	Dead	Dead	Dead	Dead	Dead	Dead	Dead	Dead	Dead	Dead	Dead	Dead	Dead	Dead	Dead	Dead	Dead	Dead	Dead	Dead	Dead	Dead	Dead	Dead	Dead	Dead	Dead	Dead	Dead	Dead	Dead	Dead	Dead	Dead	Dead
Age	983	436	810	821	622	349	813	393	527	301	800	549	618	714	485	383	686	565	735	846	715	823	538	554	714	427	571	444	586	657	693	647	684	583	641	778	401	606	578	547	325	545	138	382	297	298	328	381	711
Dead	1	1	1	1	0	1	1	1	1	1	1	1	1	1	1	1	1	1	1	1	1	1	1	1	1	1	1	1	1	1	1	1	1	1	1	1	1	1	1	1	1	1	1	1	1	1	1	1	1
W6	26.3	29.9	27	28	34.1	30.5	31.4	26.6	27.4	23	27.5	27	32.7	30	31.6	27	27.4	31.7	32.8	32.1	24.6	25.4	32.9	31.5	31.8	26.4	33.4	32.7	25.9	27.9	32	29.5	30.6	31.4	28.7	24.3	27	24.3	28.1	24	27.7	30.3		29.3	30	29	28.3	29.7	28.6
Gluc	157	159	178	171			156	142	194		158	146		129	128	144	142	144	170	152	156	143	130	121	114	119	166	176	163	159	158	159	135	159	148	183	152	148	129	159	138	127		151				136	156
Temp			37.8				38				38.3			37.7			36.3		37.8	37.9	37.6	37.7			38						36.1		37.1			37				38.1									37.5
[truncated: 311 more columns]
