# Supplementary material for: Lifespan extension in female mice by early, transient exposure to adult female olfactory cues
Source: eLife. 2022 Dec 16;11:e84060. doi: 10.7554/eLife.84060 (PMC9904757; doi:10.7554/eLife.84060)
Supplement: Figure 3—source data 1. [file elife-84060-fig3-data1.xlsx]

## Sheet: Covariates
Cage	UMI	Sex	Rx	Gene	W4w	W6w	W8w	W12w	W6m	W12m	W18m	W24m
L-cage78	OMP1477	F	MU	Het			19.2	22.5	24.6	28.4	30.4	30.3
L-cage44	OMP1114	M	ZU	WT	22.3	26.6	28.3	28.8	36.3	38.5	45.5	46.3
L-cage69	OMP1372	M	ZU	Het	23.2	27.5	30.2	33.1	40.9	46.6	49.3	45.5
L-cage69	OMP1388	M	ZU	WT	22.7	27.3	30.4	35.2	43.2	46.4	46.5	44.7
L-cage55	OMP1202	F	FU	Het	16.6	20.9	23.8	26.6	32.8	39.1	34.5	43.8
L-cage38	OMP1088	M	ZU	WT	18.5	25	27.7	31.2	37.2	44.9	45.9	43.5
L-cage69	OMP1387	M	ZU	Het	19.8	25.2	28.6	31.1	40	43.3	44.1	43.1
L-cage39	OMP1093	M	MU	WT	18.3	25.5	28.3	31.9	40.4	48.2	47.3	42.6
L-cage53	OMP1207	F	FU	WT	16.6	19.6	22.3	25.7	34.6	41.6	42.4	42.1
L-cage06	OMP0623	M	FU	WT	20.7	21.5	24.4	27.4	34.3	39.2	52.4	42
L-cage76	OMP1430	M	MU	WT	18.9	22.4	26.5	30.4	36.6	43.6	44.1	41.8
L-cage11	OMP0701	M	MU	WT	19.1	26	29.1	32.7	43.3	48.5	46.8	41.5
L-cage18	OMP0778	M	MU	WT	19.3	27	28.6	31	38.8	41.9	40	40.9
L-cage33	OMP1043	M	FU	Het	18.8	26.7	30.7	33.8	40.7	46	49.3	40.9
L-cage18	OMP0776	M	MU	Het	19.9	28	29.1	30.9	39.4	43.5	40.6	40.7
L-cage44	OMP1116	M	ZU	Het	20.5	25.6	29.7	32.4	35.7	36.7	38.4	40
L-cage27	OMP0951	M	MU	WT	19.4	27.5	30.1	32	40.4	45.4	38.7	39.9
L-cage29	OMP0985	M	ZU	Het	15.4	22.6	25.7	27.8	32.7	40.6	42.4	39.7
L-cage24	OMP0860	M	ZU	WT	19.9	23	26	28.5	33.1	38.7	39.2	39.5
L-cage28	OMP0970	M	FU	Het	20.3	23.8	26.1	29.1	34.3	39	40.3	39.5
L-cage18	OMP0777	M	MU	WT	16.8	25.6	27.1	30.4	38.2	42.5	40.4	39.3
L-cage89	OMP1595	M	MU	WT	23.1	25.4	26.7	29.5	27	39.4	40.1	39.3
L-cage38	OMP1085	M	ZU	Het	18.8	26.8	29.4	32.7	33.6	40.3	37.8	39
L-cage01	OMP0537	M	FU	WT	15.8	23.2	26.1	29.1	34.3	34.4	39.4	38.9
L-cage64	OMP1318	M	FU	WT	22.2	26	29	31.5	37.3	38	39.6	38.9
L-cage01	OMP0541	M	FU	WT	14.6	20.2	24	26.2	31.3	35.7	40.5	38.8
L-cage27	OMP0954	M	MU	Het	18.4	28.3	30.1	31.5	41.3	44.4	42.2	38.8
L-cage73	OMP1411	M	ZU	Het	17.5	25.8	28.4	30.7	33.2	30.6	31.6	38.7
L-cage66	OMP1320	M	FU	WT	19.9	25.5	30.3	29	36	38.4	41.9	38.5
L-cage52	OMP1182	M	FU	WT	17.4	23.1	27.1	30.8	32.5	40.7	39.5	38.4
L-cage19	OMP0804	M	FU	Het	21.4	26.5	29.4	31.6	38.3	42.6	44	38.2
L-cage82	OMP1505	M	ZU	WT	21.5	25.7	28.3	30.6	38.1	42.4	44.2	38.2
L-cage86	OMP1555	F	MU	WT	16	19.5	20.8	24.9	28.4	31.3	29.2	38.2
L-cage36	OMP1063	M	ZU	WT	18.3	21	22.4	27.7	28.7	31.7	33.5	37.7
L-cage21	OMP0806	F	FU	WT	18.9	19.7	21.7	25	26.3	38	35.9	37.4
L-cage52	OMP1183	M	FU	WT	15.1	22.8	26.3	29.5	33.9	39.5	39.6	37.3
L-cage92	OMP1644	M	ZU	Het	21.4	24.9	26.8	30	32.8	35.6	35.5	37.3
L-cage88	OMP1579	M	MU	Het	15.1	21.3	24.9	27.7	30.4	33.9	33.3	37
L-cage75	OMP1432	M	MU	WT	26.3	27.8	29.7	32.8	43.8	47	48.6	36.9
L-cage84	OMP1512	M	FU	Het	17.6	23.2	25.5	27.3	33.8	38.3	39.9	36.7
L-cage19	OMP0803	M	FU	WT	20.5	25.5	26.9	29.6	33.4	37.3	37.8	36.6
L-cage43	OMP1142	F	MU	WT	17.6	20.2	21.8	24.3	28.9	32.3	32.7	36.6
L-cage76	OMP1440	M	MU	Het	16.5	20.4	24.3	26.9	33.7	38.6	38.8	36.4
L-cage19	OMP0802	M	FU	WT	18.3	24.8	26.9	30.1	34.9	39.7	37.1	36.3
L-cage39	OMP1095	M	MU	WT	17.8	23.8	26.1	30.4	36.9	38.5	37.9	36.3
L-cage65	OMP1322	F	FU	WT	16.9	20.9	22.9	24.3	29.4	33.9	36.4	36.2
L-cage92	OMP1645	M	ZU	WT	17.8	23.2	25.2	28.9	32.8	34.7	34.2	36.2
L-cage09	OMP0676	F	ZU	Het	13.8	20.5	20.6	22.8	30.4	33.2	31.1	35.9
L-cage74	OMP1422	M	FU	WT	17.8	25.6	28	30.4	40.5	48.5	39.4	35.9
L-cage27	OMP0950	M	MU	WT	17.9	23.6	25	29.5	35.5	39.9	36.5	35.8
L-cage66	OMP1335	M	FU	WT	21.1	26.8	30.1	31.2	36.5	38.5	38.1	35.8
L-cage10	OMP0681	M	MU	Het	17.9	22.6	25.3	26.6	32	36.3	37.5	35.6
L-cage48	OMP1149	M	ZU	WT	17.7	22.4	24.9	26.3	30.6	36.5	40.3	35.6
L-cage62	OMP1306	M	MU	Het	18	24.7	25.5	29.9	34.2	36.1	36.4	35.6
L-cage54	OMP1205	M	FU	Het	18.9	25.3	29.3	32.3	43.1	43.5	40.3	35.5
L-cage05	OMP0597	M	ZU	WT	14.6	21.3	23.6	26.8	32.6	34.7	35.9	35.4
L-cage29	OMP0977	M	ZU	Het	16.5	24.8	27.5	29.4	32.7	33.5	33	35.4
L-cage24	OMP0868	M	ZU	Het	20.6	22.8	26.2	27	30.1	34.6	34.2	35.1
L-cage87	OMP1574	F	MU	Het	14.2	18.4	21.2	23.1	29.4	35.7	39.4	35.1
L-cage75	OMP1433	M	MU	WT	24.3	25.5	26	27.8	33.2	37.1	38.7	35
L-cage30	OMP0988	F	ZU	WT	15.8	20.9	22.9	24.1	27	28.5	30.5	34.8
L-cage74	OMP1426	M	FU	Het	18.7	26	27.3	31.1	37.9	43.7	43.4	34.7
L-cage10	OMP0684	M	MU	WT	16.9	23.1	25.8	27.9	32.4	35.1	37.9	34.6
L-cage21	OMP0807	F	FU	Het	16.6	19	21.6	22.9	31.4	30.7	34.6	34.6
L-cage23	OMP0818	M	FU	Het	18.2	22.9	24.7	28.3	31.5	34.4	35.2	34.6
L-cage64	OMP1336	M	FU	Het	19.4	24.4	27.8	30.6	33.4	36.5	37.8	34.6
L-cage73	OMP1408	M	ZU	Het	18.6	24.1	26.4	29	31.3	35.5	36.4	34.6
L-cage16	OMP0748	F	FU	Het	15.3	18.5	20.1	22	27	33.5	36.2	34.5
L-cage88	OMP1571	M	MU	WT	20.1	25.8	29.1	31.6	35.9	44.3	44.3	34.3
L-cage28	OMP0971	M	FU	WT	20.3	23.2	26.2	29.5	32	35.8	35.7	34.2
L-cage53	OMP1209	F	FU	WT	14.5	17.1	19.5	20.8	25.8	31.9	35.3	34.2
L-cage55	OMP1200	F	FU	WT	14	19.7	22	24.5	28.9	32.9	34.4	34.1
L-cage77	OMP1449	F	FU	Het	18.7	19.9	21	25.7	33.4	43.8	34.1	34.1
L-cage88	OMP1578	M	MU	Het	15.7	21	29.2	27.5	31.9	33.3	32.4	34.1
L-cage29	OMP0979	M	ZU	WT	19.1	27.1	30.9	34.4	40.1	27.2	31.3	34
L-cage89	OMP1596	M	MU	WT	22.1	25.6	27.4	29.8	22.7	34.5	34.7	33.9
L-cage68	OMP1366	M	MU	Het	15.9	23.2	25.9	28.3	34.6	36.9	35.5	33.8
L-cage15	OMP0732	M	FU	WT	13.3	21.7	24.7	27	34	34.3	34.7	33.6
L-cage08	OMP0665	M	ZU	WT	15	26.1	28	27.4	31.6	33.5	32.8	33.4
L-cage13	OMP0722	M	FU	Het	15.8	24.2	26.2	28.6	32.9	38.8	37	33.4
L-cage81	OMP1497	M	ZU	Het	20.3	23.6	25.7	27.1	31.3	33.6	33.8	33.4
L-cage05	OMP0557	M	ZU	Het	15.8	20.4	22.8	24.9	29.3	31.7	31.7	33.2
L-cage76	OMP1439	M	MU	Het	17.1	21.4	26.6	29.2	33.7	34.7	34.3	33.2
L-cage24	OMP0858	M	ZU	WT	20.8	24.8	28.3	29.3	32	33.3	32.8	33.1
L-cage50	OMP1187	M	MU	WT	15.5	23.9	27.7	28.8	35.5	34.8	34.1	32.9
L-cage68	OMP1363	M	MU	WT	17.1	23.3	27.1	30.5	37.3	39.4	38.3	32.8
L-cage08	OMP0668	M	ZU	Het	15.6	21.8	24.2	27.4	32.7	32.9	33.1	32.7
L-cage36	OMP1065	M	ZU	WT	18.4	23.2	24.1	29.1	30.4	33.5	34	32.6
L-cage84	OMP1513	M	FU	WT	17.5	21.5	23.6	25.8	30.5	29.8	31.5	32.6
L-cage74	OMP1423	M	FU	WT	16.8	24.5	27.2	29.9	38.5	44.2	34.7	32.5
L-cage45	OMP1122	M	ZU	Het	17.3	24.7	25.3	27.8	31.4	37.7	34.1	32.3
L-cage86	OMP1550	F	MU	Het	16.6	19.9	22.2	24.1	27.7	30.7	30.2	32.2
L-cage59	OMP1278	F	FU	WT	15.2	18.3	21.8	24	27.9	30.2	25.1	32.1
L-cage02	OMP0578	M	MU	Het	11.8	21.7	23.8	27	31.4	33.5	33	32
L-cage48	OMP1150	M	ZU	Het	16.5	22.8	25.6	27.9	32.5	37.2	39.8	31.8
L-cage50	OMP1190	M	MU	Het	16.4	24.5	27.7	29	36.1	46.3	37.8	31.7
L-cage06	OMP0621	M	FU	WT	19.3	20.6	23	28.1	32.1	33.5	42.5	31.6
L-cage75	OMP1431	M	MU	Het	22.9	23.2	23.6	26.5	32.3	33.7	32.8	31.6
L-cage16	OMP0751	F	FU	Het	15.3	19.1	21.1	23.6	28	32.3	31.9	31.5
L-cage01	OMP0562	M	FU	Het	12.9	22	24.6	26.2	28.2	28.6	30.8	31.3
L-cage74	OMP1425	M	FU	Het	14.6	21	23	25	30.4	38.4	39.7	31.2
L-cage42	OMP1134	F	MU	WT	17.9	20.3	22.3	25.5	29	34.3	31.3	31.1
L-cage81	OMP1498	M	ZU	Het	19	22.5	23.1	25.4	28.2	30.6	31	31
L-cage31	OMP1004	F	ZU	Het	15.9	20.3	22.7	25.5	29.1	30.8	29.6	30.9
L-cage62	OMP1307	M	MU	WT	16.5	23.6	25.9	27.1	31.9	33.2	34.2	30.9
L-cage46	OMP1125	F	ZU	Het	14.7	20.6	22.6	28.2	27.4	29.5	29.6	30.7
L-cage52	OMP1179	M	FU	Het	15.2	21.8	25	27.9	31	38.3	37.9	30.7
L-cage75	OMP1438	M	MU	Het	24.9	25.2	25.6	27.2	32.4	32	30.9	30.6
L-cage25	OMP0873	F	ZU	WT	15.6	17.8	19.5	21.3	23.8	26.1	28.1	30.5
L-cage65	OMP1339	F	FU	WT	17.6	18.7	21.6	21.7	25.1	28.4	29.1	30.4
L-cage72	OMP1402	F	ZU	WT	14.1	20.4	21.4	23.5	27.3	33	31.7	30.4
L-cage16	OMP0747	F	FU	WT	15.4	20.2	20.2	21.6	29.3	33.9	31.2	30.2
L-cage64	OMP1337	M	FU	WT	17.8	22.7	25.5	26.9	30.5	31.3	32.2	30.2
L-cage79	OMP1484	M	MU	Het			22.8	24.6	30.5	32.2	29.9	30
L-cage01	OMP0561	M	FU	Het	12.9	19.8	22.4	24.8	29.5	31.5	34	29.8
L-cage45	OMP1124	M	ZU	Het	15.8	22.8	24.2	27.5	28.9	32.5	39.8	29.8
L-cage20	OMP0815	F	FU	WT	17.5	18.3	20.4	21.7	25.9	27.5	27.8	29.6
L-cage02	OMP0577	M	MU	WT	12.2	19	21.6	25.4	29.3	30.7	30.2	29.3
L-cage22	OMP0822	F	FU	Het	17.2	19.7	21.1	24.2	27.5	30.2	30.3	29.3
L-cage10	OMP0683	M	MU	WT	17.9	23.4	25.7	27.4	31.4	32	29.6	29.2
L-cage03	OMP0553	F	ZU	Het	15	18.3	19.3	22.1	25.6	29.1	31	29.1
L-cage24	OMP0857	M	ZU	Het	21.1	23.8	27.3	29	31.1	33	34.2	28.9
L-cage26	OMP0943	M	MU	Het	16.9	25.8	29.2	30.9	35.3	40.3	40.5	28.9
L-cage53	OMP1208	F	FU	Het	16.1	21.7	23.8	26.9	32.1	33.2	30	28.7
L-cage43	OMP1143	F	MU	WT	17.2	18.8	19.7	21.5	24	23.5	28.2	28.5
L-cage11	OMP0702	M	MU	Het	18.4	24.8	28	31.8	39.9	44.5	43	28
L-cage47	OMP1127	F	ZU	Het	15	18.6	19.9	22.5	25.7	27.2	26.7	27.6
L-cage42	OMP1146	F	MU	WT	15.7	18.4	19	22.2	25.4	28.7	29.1	26.9
L-cage32	OMP1030	F	MU	Het	14.7	17.8	20.9	21.1	24.3	25.6	27.1	26.2
L-cage71	OMP1391	M	FU	WT	18.6	25.5	28.2	29.6	31.8	37.1	39.1	25.8
L-cage48	OMP1152	M	ZU	Het	16.3	21.3	24.3	26.4	32.5	37.4	40.8	25.5
L-cage03	OMP0554	F	ZU	WT	15.7	18.9	19.9	21.8	29.3	30.7	25.7
L-cage03	OMP0559	F	ZU	WT	14.6	18.4	19.6	22.6	25.2	29.8	29.7
L-cage02	OMP0575	M	MU	Het	10.7	21.8	21.2	24.6	29.3	30.2
L-cage02	OMP0579	M	MU	WT	11.8	19.3	22.8	25.9	28.4	29.5
L-cage03	OMP0591	F	ZU	Het	15	19	20.5	22.9	28.2	31.7	32.6
L-cage04	OMP0592	F	ZU	Het	14.1	18.4	19.9	21.9	26.3
L-cage04	OMP0593	F	ZU	WT	14.7	19.4	20.7	25	29.3	31.2	40.3
L-cage05	OMP0594	M	ZU	Het	16	24.5	27.1	30.8	40.1
L-cage04	OMP0595	F	ZU	Het	13.8	18	19.5	22.6	27.9	32.7	34.5
L-cage04	OMP0596	F	ZU	WT	12.6	17.6	18.5	21.8	28.3
L-cage05	OMP0598	M	ZU	WT	14.7	21.5	22.9	25.7	32.8	35	35.5
L-cage06	OMP0620	M	FU	Het	12.9	23.4	26.7	29	37.5	41.2	56.1
L-cage06	OMP0624	M	FU	Het	22.8	23.8	25.9	28.2	37	39.9	52
L-Cage07	OMP0641	F	MU	WT	10.2	14.4	19.6	21	28.1	33.1	34.9
L-Cage07	OMP0642	F	MU	WT	11.2	19.3	22	24.8	30.2	30.9	33.4
L-Cage07	OMP0643	F	MU	Het	11.6	14.8	22.1	25.2	32	36.7	35.6
L-Cage07	OMP0644	F	MU	Het	10.7	14.2	20.9	24.2	29.5	36	26.8
L-cage08	OMP0666	M	ZU	Het	19.6	22	24.9	31	38.6	40	39.8
L-cage08	OMP0667	M	ZU	WT	17.1	24.2	26.6	29.3	37.3	42.3
L-cage09	OMP0677	F	ZU	Het	13.3	20.2	21.4	24.4	27.4	29.4
L-cage09	OMP0678	F	ZU	WT	12.4	19.2	21.1	24.5	32.7	33.5
L-cage09	OMP0679	F	ZU	WT	11.7	19.9	21.6	24.1	28.1	29.6
L-cage10	OMP0682	M	MU	Het	18.1	24.3	26.7	29.9	37.2	41.4	40.8
L-cage11	OMP0700	M	MU	WT	18	24.6	27.3	30.7	38.7	42.8	50.2
L-cage11	OMP0703	M	MU	Het	18.3	25	27.8	30.5	35.3	37	37.6
L-cage12	OMP0704	F	MU	Het	16.9	20.4	22.1	24.4	30.6	35	39.7
L-cage12	OMP0705	F	MU	Het	17.5	21.2	23.2	25.8	31.4	37.9	36.2
L-cage12	OMP0706	F	MU	WT	16.2	19.2	21.5	22.8	27.7	27.6	28.6
L-cage12	OMP0707	F	MU	WT	14.8	17.2	19	21.4	25.1	30	34.3
L-cage13	OMP0723	M	FU	WT	16.1	23.8	26.4	28.5	32.4	38.2
L-cage13	OMP0724	M	FU	Het	14.3	21.8	23.8	26.3	28.3	31.7
L-cage14	OMP0725	F	FU	WT	14.6	19	21.4	23.5	28.4	33.2
L-cage14	OMP0727	F	FU	Het	14	18.3	20.3	22	26.3	30	32.3
L-cage14	OMP0728	F	FU	Het	14	18.5	21.5	23.9	29.9	35
L-cage14	OMP0729	F	FU	WT	14.1	18.4	20.1	22.5	27.7	31.8	32.3
L-cage13	OMP0730	M	FU	WT	13.1	20.8	23.2	25.3	31.2	37.9	33.2
L-cage15	OMP0731	M	FU	WT	12.3	20.1	24.3	27.2	31.2	32.5	32.9
L-cage15	OMP0733	M	FU	Het	13.1	22.1	25.2	28.7	35	32.5
L-cage15	OMP0734	M	FU	Het	13.2	20.9	23.5	26.4	31.6	37.3
L-cage16	OMP0750	F	FU	WT	15.4	21	22.7	25.1	30.3	33.9
L-cage17	OMP0763	F	FU	WT	14.3	18.8	21.9	23.9	28.2	32	36.6
L-cage17	OMP0764	F	FU	Het	16.2	20.6	23	25.6	34.1
L-cage17	OMP0765	F	FU	Het	15.1	19.1	21.3	24	30.5
L-cage17	OMP0766	F	FU	WT	16	19	20.5	23.1	29.6	32.4	34.5
L-cage18	OMP0780	M	MU	Het	17.5	24	26.8	28.6	37.7	43.7
L-cage19	OMP0805	M	FU	Het	20.7	23.8	26.3	28.5	33.4	36.6	35.6
L-cage23	OMP0808	M	FU	WT	15.9	22.7	25.9	30.2	34.1	36.7	35.6
L-cage23	OMP0809	M	FU	WT	20.3	23.7	26.3	29.2	37.1	35.9
L-cage20	OMP0810	F	FU	Het	16.5	20.3	22.3	23.4	26.6	26.4	29
L-cage20	OMP0811	F	FU	Het	15.8	19.4	21.6	24.1	27.4	31.9
L-cage21	OMP0812	F	FU	Het	14.9	16.7	17.4	18.9	23
L-cage21	OMP0813	F	FU	WT	16.9	19.2	21.3	22.6	27.4	30.9
L-cage20	OMP0814	F	FU	WT	16.2	19.7	19.9	23.4	29.1	37.8
L-cage23	OMP0816	M	FU	Het	18.7	24.1	26.2	29.2	36.7	38.7	34.7
L-cage22	OMP0819	F	FU	WT	15	16.6	19.4	21.3	24.3	25.4
L-cage22	OMP0821	F	FU	WT	15.2	19.3	20.9	23.4	26.2	33.6	32.9
L-cage22	OMP0823	F	FU	Het	17.2	20.2	21.8	23.7	27	35.2
L-cage25	OMP0861	F	ZU	Het	18.3	20.9	23.7	24.5	29.8	33.8
L-cage25	OMP0862	F	ZU	Het	18.4	19.3	20.7	23.2	26.6	25.7	25
L-cage25	OMP0871	F	ZU	WT	20.4	20.9	22.5	24.5	28.2	31.8
L-cage26	OMP0942	M	MU	WT	18.6	24.2	27.4	30.2	35.1	35.7	36.7
L-cage26	OMP0944	M	MU	WT	18.6	27.2	29.8	32.7	37.7	37.6
L-cage26	OMP0945	M	MU	Het	18.7	23.7	25.7	27.6	33.2	35.5	32.2
L-cage27	OMP0952	M	MU	Het	20.1	26.2	28.4	32.4	40	48.5	44.7
L-cage28	OMP0968	M	FU	WT	20.2	23.8	26.3	28.5	32.6	35.7	34.4
L-cage28	OMP0969	M	FU	Het	18.4	24.6	27.8	29.4	32.7	34.9	32.1
L-cage30	OMP0980	F	ZU	WT	15	21.1	23.6	24.4	26.6	31.4	34.5
L-cage30	OMP0982	F	ZU	Het	13.8	17.6	18.7	20.6	24.1	28.5	30.5
L-cage29	OMP0986	M	ZU	WT	15.3	25	28.3	31.1	40.9	43.3
L-cage30	OMP0989	F	ZU	Het	16.4	21	23	23.9	26.8	32.2	32.8
L-cage31	OMP0999	F	ZU	Het	14.8	19.6	21.2	24.8	29.6	31.4
L-cage31	OMP1001	F	ZU	WT	14.8	19.4	22.6	25.3	27.9	31.6	31.7
L-cage31	OMP1002	F	ZU	WT	14.3	18.9	20.5	25	27.6	26
L-cage32	OMP1022	F	MU	Het	16.9	19.8	24.9	24.6	28.7	29.3	35.6
L-cage32	OMP1023	F	MU	WT	18.1	19.7	23.1	24.5	30	36.4	25.6
L-cage32	OMP1031	F	MU	WT	12.8	16	19.4	19.9	23.7
L-cage34	OMP1034	F	ZU	WT	15.6	21.8	23.9	27.2	35.4	41.4	40.2
L-cage34	OMP1036	F	ZU	WT	15.7	21.7	24.2	26	34.2	42.4	33.7
L-cage34	OMP1038	F	ZU	Het	15.3	21.1	24.4	27.6	35
L-cage34	OMP1039	F	ZU	Het	15.7	22	24.1	26.4	31.8	35.2
L-cage33	OMP1040	M	FU	WT	17	28	31.9	34.2	37.3	35.7
L-cage33	OMP1041	M	FU	WT	18.2	26.3	30.6	32.2	37.7	43.2	42.9
L-cage33	OMP1042	M	FU	Het	16.3	24.7	26.9	28.7	31.3	32.2	34.3
L-cage35	OMP1049	F	ZU	Het	16	21.7	24.3	25.1	28.2	32.3
L-cage35	OMP1051	F	ZU	WT	16.2	21	24.3	26.5	30.8	39.2	40.1
L-cage35	OMP1053	F	ZU	WT	16.4	21.2	23.7	24.9	29.8
L-cage35	OMP1054	F	ZU	Het	16.1	21.2	24.3	25.1	27.7	29.9	31.7
L-cage36	OMP1062	M	ZU	Het	20.2	23.6	24.7	29.8	32.6	35.5	35.2
L-cage36	OMP1064	M	ZU	Het	18.1	23.2	25.6	30.3	30.7
L-cage37	OMP1081	F	FU	Het	17.4	22	24.1	27.6	32.7
L-cage37	OMP1082	F	FU	Het	16.9	21.7	22.9	25.2	30	32.5	33.8
L-cage37	OMP1083	F	FU	WT	18.1	24.2	25.6	27.3	32.7	35.2
L-cage37	OMP1084	F	FU	WT	14.5	21	22.1	24	26.5	32.9
L-cage38	OMP1086	M	ZU	Het	18.9	25.4	29	33	34.8	34.2	34.5
L-cage38	OMP1087	M	ZU	WT	16.3	22.5	26.7	29.6	30.8	33.4
L-cage40	OMP1089	F	ZU	WT	17	19.1	20.5	23.5	27	31.8	36.3
L-cage40	OMP1090	F	ZU	WT	16.6	20.4	22.3	24.5	30.8	31.5	32.4
L-cage39	OMP1092	M	MU	Het	19.4	26	27.8	31.2	38.1
L-cage39	OMP1094	M	MU	Het	18.8	26.5	27.9	30.6	38	44.3	45.7
L-cage40	OMP1105	F	ZU	Het	13.2	18.3	18.1	20.4	25.2	30.9
L-cage40	OMP1106	F	ZU	Het	13.1	18.9	18.9	23	28.3	33.6	27.6
L-cage41	OMP1110	F	FU	Het	14.3	19.4	22.8	24.6	31.6	34.8
L-cage41	OMP1111	F	FU	WT	12.6	17.3	21	21	26.5	30.6	28.7
L-cage41	OMP1112	F	FU	WT	12.4	19.5	19.6	21.9	25.3	28.5	28.2
L-cage41	OMP1113	F	FU	Het	12.5	16.7	19.8	20.5	27	26.8
L-cage44	OMP1115	M	ZU	Het	20	24.7	26.8	28.7	33.6	39.3	36.7
L-cage44	OMP1117	M	ZU	WT	21.2	25.1	27.9	31.3	35.1	37.9
L-cage47	OMP1118	F	ZU	WT	15.4	19.6	20.6	23.6	29.9	29.3	31.5
L-cage47	OMP1119	F	ZU	WT	18.3	21.4	22.3	25.7	35.1	39.9
L-cage45	OMP1121	M	ZU	WT	18.2	24.6	25.8	39.4	33.2	39.9	37.5
L-cage45	OMP1123	M	ZU	WT	17.2	23.9	25.8	29.1	36.2	39.6
L-cage46	OMP1126	F	ZU	WT	14	20.3	22.2	21.1	26.1	26.5
L-cage47	OMP1128	F	ZU	Het	16.6	21.7	23.3	26.4	35.2	40.5	39.8
L-cage42	OMP1131	F	MU	Het	15.5	18.2	20.1	22.2	27	30.1
L-cage42	OMP1132	F	MU	Het	16.4	19.2	20.4	21.2	24.3	26.9	28.8
L-cage46	OMP1139	F	ZU	WT	18.9	22.5	25.1	28.3	36.3	41.4
L-cage46	OMP1140	F	ZU	Het	19	22.9	25	28.6	34.3	36.2
L-cage43	OMP1144	F	MU	Het	16.9	20.6	21.4	23.4	28.1	31.6	30.6
L-cage43	OMP1147	F	MU	Het	16.4	19.9	20.2	22.8	24	27.6
L-cage48	OMP1151	M	ZU	WT	17.9	24	28.5	29.8	37.3	43	47.8
L-cage51	OMP1177	F	MU	WT	18	19.2	21.7	29.7	31.7
L-cage52	OMP1181	M	FU	Het	19.3	25.1	29.5	31.4	35.2	36.8
L-cage50	OMP1188	M	MU	Het	16.7	24	27.7	31.8	40.9	50.2	38.9
L-cage50	OMP1189	M	MU	WT	15.9	23.6	25.9	28.4	32.5	31.9	32.7
L-cage51	OMP1191	F	MU	Het	14.2	18.4	21.5	23.9	27.7	30.5
L-cage51	OMP1193	F	MU	Het	14.4	19.3	21.6	23.4	30.3	31.9
L-cage51	OMP1194	F	MU	WT	14	19.3	21.5	24.3	27.7	33.1	30.4
L-cage55	OMP1198	F	FU	Het	14.6	19.7	21.8	24.1	27.4	30.4	32.8
L-cage55	OMP1199	F	FU	WT	12.5	16.8	19.7	22.2	26.6	30.5	32.1
L-cage53	OMP1201	F	FU	Het	15.4	19.7	22.8	25.8	31.7	33.2
L-cage54	OMP1203	M	FU	WT	17.9	24.8	28.5	31.7	37.9	45.2	36.1
L-cage54	OMP1204	M	FU	WT	19.8	25.3	30.1	33.8	42.6	41.7	40.3
L-cage54	OMP1206	M	FU	Het	17.7	23	27.3	29.8	38.2	40.5	37.9
L-cage56	OMP1217	F	MU	Het	13.7	18.1	20.5	23.8
L-cage56	OMP1218	F	MU	WT	13.9	18	19.5	22.1	26.1	32	32.8
L-cage56	OMP1219	F	MU	WT	13.5	16.8	18.3	21.6	25.9	25.9
L-cage56	OMP1220	F	MU	Het	13.2	17.5	20.6	23.2	29.3	39
L-cage57	OMP1227	F	ZU	WT	13	18.5	20.7	22.6	29.2	28.9	29.8
L-cage57	OMP1229	F	ZU	WT	13.9	18.5	18.8	23.1	30.5	30.2	29.9
L-cage57	OMP1231	F	ZU	Het	13.5	18.2	19.9	22.7	28	31.2
L-cage57	OMP1239	F	ZU	Het	14.3	18.5	18.8	21.6	27.5	28.5
L-cage58	OMP1244	F	FU	WT	13.1	18.6	19.7	21.6	25.6	28.3	28.6
L-cage58	OMP1245	F	FU	Het	13.3	18.7	18.9	20.6	24.6	26.3	31.1
L-cage58	OMP1246	F	FU	WT	13.4	16.8	19.2	21.6	26.4	27.2	27.5
L-cage58	OMP1247	F	FU	Het	13.2	17.6	19.1	21.3	25.4	26.4	24.4
L-cage59	OMP1276	F	FU	Het	17.5	21.1	25.5	27.6	32.9	33.9
L-cage59	OMP1277	F	FU	Het	17.3	20.5	22.6	25.2	31.5	32.2	23.7
L-cage59	OMP1279	F	FU	WT	15.4	18	20.1	22.1	26.2	29.5	19.3
L-cage60	OMP1282	F	MU	Het	16.4	21.4	21.8	25.1	30
L-cage60	OMP1283	F	MU	Het	14.9	19	21	24.3	29
L-cage60	OMP1284	F	MU	WT	15.4	20.3	22.7	26.2	32	30
L-cage61	OMP1285	F	MU	Het	14.3	19.6	20.5	23	28.3
L-cage61	OMP1286	F	MU	Het	15.4	20.3	21.3	23.6	29.7	31.2
L-cage61	OMP1294	F	MU	WT	16.4	21.6	23.1	26	34.7	35.7	38.9
L-cage61	OMP1295	F	MU	WT	13.8	16.5	21	23.3	27.9	30.9	25.6
L-cage60	OMP1296	F	MU	WT	15.5	19.2	20.6	22.3	31.5
L-cage62	OMP1305	M	MU	WT	18.8	24.9	28.7	30.5	34	35.5	37.6
L-cage62	OMP1312	M	MU	Het	15.9	23.9	27.9	30.1	37.8	35.8
L-cage63	OMP1314	F	MU	Het	12.7	19.4	21.3	23	28.6	29	32.5
L-cage63	OMP1315	F	MU	Het	13.5	17.9	20	22.7	27.5
L-cage63	OMP1316	F	MU	WT	14.2	18.8	21.1	23.3	29.4	31.9	32.9
L-cage63	OMP1317	F	MU	WT	12.9	17.2	21.2	22.7	27.8	30.7	35.6
L-cage64	OMP1319	M	FU	Het	19.3	23	25.6	27.6	31.2	33.3
L-cage65	OMP1323	F	FU	Het	17.6	20	23.1	25.6	31.8	26.2	27.1
L-cage66	OMP1333	M	FU	Het	20.1	24.3	27.6	28.1	32.7	33.5	33.5
L-cage66	OMP1334	M	FU	Het	19.9	24.5	28.5	29.6	32	31.8	34.4
L-cage65	OMP1338	F	FU	Het	16.1	18.6	21.4	22.5	26.4	30.9
L-cage67	OMP1348	M	ZU	WT	19.4	25.5	29.9	32.8	38.6	44.2	34.6
L-cage67	OMP1349	M	ZU	WT	17.2	24	26.6	29.7	32.8	36.5	35.9
L-cage67	OMP1350	M	ZU	Het	19.7	27.7	30.4	32.9	37.3	40.8	40.3
L-cage67	OMP1351	M	ZU	Het	18.1	26.9	30	32.5	37.9	34.5
L-cage68	OMP1364	M	MU	Het	17.1	23.8	27	32.4	40.1	45.9
L-cage68	OMP1365	M	MU	WT	17.3	24.7	27.9	33.5	38.9	41.1	37.1
L-cage69	OMP1371	M	ZU	WT	23.2	27.2	29.9	32.9	44.3	43.4	37.5
L-cage70	OMP1374	F	ZU	WT	19	20.2	23.4	24.5	28.8	28.3
L-cage70	OMP1376	F	ZU	WT	17.8	21.3	22.8	26.1	30.5
L-cage70	OMP1389	F	ZU	Het	18.3	21.4	23.6	26.3	35.8	32.6	32.5
L-cage70	OMP1390	F	ZU	Het	16.5	21.3	21.6	24.9	31.1	33.3
L-cage71	OMP1392	M	FU	Het	19.9	23.8	26.1	28.6	34.7	38.1
L-cage71	OMP1393	M	FU	Het	19.9	28	30.6	33.7	42.8	52.4
L-cage71	OMP1394	M	FU	WT	19.4	25.5	28.5	31.9	41.6	48.7	39.8
L-cage72	OMP1404	F	ZU	Het	15	21.3	22	24.3	29.7	31.8
L-cage72	OMP1405	F	ZU	Het	14.1	20.1	20.6	22.7	27.6	29.6	34.3
L-cage72	OMP1406	F	ZU	WT	14.7	18.8	21.3	23	26.2	32.1	31.6
L-cage73	OMP1410	M	ZU	WT	16.4	23.8	25.6	28.3	31.6	36.2
L-cage73	OMP1412	M	ZU	WT	15.6	24.3	25.8	29.1	31.5	35.1	36.9
L-cage76	OMP1441	M	MU	WT	15.5	18.6	22.5	24.7	28.2	29.9
L-cage77	OMP1447	F	FU	WT	17.4	18.3	20.1	23	25.2	28.8
L-cage77	OMP1448	F	FU	WT	18.6	19	19.7	23.9	31.5	37.9
L-cage77	OMP1452	F	FU	Het	18.3	19.5	20.7	24.3	32.7	39	31.2
L-cage78	OMP1476	F	MU	WT			20.2	22.5	26.5	31.1	33.8
L-cage78	OMP1478	F	MU	WT			22.1	24.5	30.7	36.1	35.1
L-cage80	OMP1479	F	MU	Het			21.7	23.3	25.9	29.2	43.6
L-cage80	OMP1480	F	MU	Het			23.1	24.9	28.8	32.7	37.8
L-cage78	OMP1481	F	MU	Het			21.4	24.2	27.4	34.3	35.2
L-cage79	OMP1482	M	MU	WT			25.7	28	35.8	40.9
L-cage79	OMP1483	M	MU	Het			25.9	28.7	34.2	37.4	33.9
L-cage79	OMP1485	M	MU	WT			27.3	29.9	31.8	34.8
L-cage80	OMP1488	F	MU	WT			22.2	23.8	30.7	34.5	43.6
L-cage80	OMP1489	F	MU	WT			21.2	33.2	27.9	32.8	35.5
L-cage81	OMP1499	M	ZU	WT	21.8	25	27.1	28.7	33.1	36.4	39.2
L-cage81	OMP1500	M	ZU	WT	22	26	28	31.1	36.3	42.9	40.3
L-cage82	OMP1501	M	ZU	WT	19.3	23.8	26.6	29.4	36.4	44.6	50.3
L-cage82	OMP1504	M	ZU	Het	23.5	28.6	31.2	33.4	36.5	38.9	41.9
L-cage82	OMP1506	M	ZU	Het	21.7	26.6	29.4	32.2	40.6	47.5
L-cage83	OMP1508	F	ZU	Het	18.1	20.5	22.2	26.2	32.1	33.2
L-cage83	OMP1509	F	ZU	WT	16.2	19.5	21	24.2	31.1
L-cage83	OMP1510	F	ZU	WT	17.6	22	22.8	27.7	36.3	33.8
L-cage83	OMP1511	F	ZU	Het	18.9	23.5	24.8	29.5	39.6	45.7
L-cage84	OMP1514	M	FU	WT	17.9	22.7	24.7	26.9	30.4	32.1
L-cage84	OMP1515	M	FU	Het	18.2	21.5	24	25.7	29	31.1	34.8
L-cage85	OMP1520	F	FU	Het	16.5	18.6	21.9	22.4	25.9	30.5	33.1
L-cage85	OMP1522	F	FU	Het	16.8	18.9	21.8	22.4	27.9	30.3	31.8
L-cage85	OMP1524	F	FU	WT	14.5	18	22	22.9	26.2	30.2	36.6
L-cage85	OMP1525	F	FU	WT	16	16.5	20	21.7	25.7	25.6
L-cage86	OMP1552	F	MU	WT	14.8	19.9	21.4	26.1	28.4	28.2
L-cage86	OMP1554	F	MU	Het	15.4	19.6	20.8	24.3	27.4	29.2
L-cage87	OMP1575	F	MU	Het	14.7	19.4	21.7	24.3	30	34.2	36.1
L-cage87	OMP1576	F	MU	WT	15	18.6	21.8	24.3	28.5	31.4	28.3
L-cage87	OMP1577	F	MU	WT	13.7	18.5	20.9	24.1	31.5	39.5	29.1
L-cage88	OMP1580	M	MU	WT	15.3	22.2	24.2	27.8	30.2	32.5	32.2
L-cage89	OMP1593	M	MU	Het	22.3	23.9	26.4	29.7	25.3	36.3
L-cage89	OMP1594	M	MU	Het	23	25.6	27.4	29.7	32.3	35.7	37.6
L-cage90	OMP1619	F	MU	Het	17.4	22.6	24.7	28.4	32.7	39.9
L-cage90	OMP1620	F	MU	WT	14.4	18.9	21.1	24.5	21.5
L-cage90	OMP1627	F	MU	Het	15.1	20.3	21.7	25.2	16.3	29.8	32
L-cage90	OMP1628	F	MU	WT	15.7	18.6	19.8	24.3	22.8
L-cage92	OMP1646	M	ZU	Het	18.6	21.4	22.9	26.9	32.6	32.6
L-cage92	OMP1647	M	ZU	WT	18.7	24.2	25.5	32.7	36.8	36.4
