# Supplementary material for: Lifespan extension in female mice by early, transient exposure to adult female olfactory cues
Source: eLife. 2022 Dec 16;11:e84060. doi: 10.7554/eLife.84060 (PMC9904757; doi:10.7554/eLife.84060)
Supplement: Figure 4—source data 1. [file elife-84060-fig4-data1.xlsx]

## Sheet: datasheet
Date	Breeding Cage	DOB	Pup_sex	Pup_EN	Pup_Wt	Study?	Odor Type

## Sheet: Data
Date_12	BC	DOB	Sex	Date_Wean	Wt_Wean	Odor	VP	Days to VP
2015-11-15	UMHET3-51	2015-11-03	F	2015-11-24	9.6	Male	2015-11-25	22
2015-11-05	UMHET3-40	2015-10-24	F	2015-11-14	8.2	Male	2015-11-18	25
2015-10-20	UMHET3-37	2015-10-08	F	2015-10-29	10.7	Male	2015-11-03	26
2015-10-20	UMHET3-37	2015-10-08	F	2015-10-29	8.9	Male	2015-11-03	26
2015-11-03	UMHET3-43	2015-10-22	F	2015-11-12	10.3	Male	2015-11-18	27
2015-11-03	UMHET3-43	2015-10-22	F	2015-11-12	10.3	Male	2015-11-18	27
2015-11-05	UMHET3-40	2015-10-24	F	2015-11-14	9.6	Male	2015-11-20	27
2015-11-05	UMHET3-40	2015-10-24	F	2015-11-14	9.7	Male	2015-11-20	27
2015-10-20	UMHET3-34	2015-10-08	F	2015-10-29	10.7	Control	2015-11-05	28
2015-11-15	UMHET3-47	2015-11-03	F	2015-11-24	10.5	Control	2015-12-01	28
2015-10-20	UMHET3-33	2015-10-08	F	2015-10-29	10.7	Male	2015-11-05	28
2015-10-20	UMHET3-33	2015-10-08	F	2015-10-29	10.6	Male	2015-11-05	28
2015-10-20	UMHET3-33	2015-10-08	F	2015-10-29	10.2	Male	2015-11-05	28
2015-10-20	UMHET3-37	2015-10-08	F	2015-10-29	10.3	Male	2015-11-05	28
2015-11-14	UMHET3-50	2015-11-02	F	2015-11-23	10.4	Male	2015-11-30	28
2015-11-14	UMHET3-50	2015-11-02	F	2015-11-23	10.7	Male	2015-11-30	28
2015-10-20	UMHET3-34	2015-10-08	F	2015-10-29	10.4	Control	2015-11-06	29
2015-10-20	UMHET3-34	2015-10-08	F	2015-10-29	9.8	Control	2015-11-06	29
2015-10-19	UMHET3-32	2015-10-07	F	2015-10-28	10.1	Female	2015-11-06	30
2015-10-21	UMHET3-36	2015-10-09	F	2015-10-30	11.6	Control	2015-11-09	31
2015-10-21	UMHET3-36	2015-10-09	F	2015-10-30	10.9	Control	2015-11-09	31
2015-11-17	UMHET3-46	2015-11-05	F	2015-11-26	10.9	Male	2015-12-06	31
2015-11-05	UMHET3-42	2015-10-24	F	2015-11-14	11.7	Control	2015-11-25	32
2015-11-15	UMHET3-47	2015-11-03	F	2015-11-24	8.4	Control	2015-12-05	32
2015-11-04	UMHET3-41	2015-10-23	F	2015-11-13	11.1	Control	2015-11-25	33
2015-11-15	UMHET3-47	2015-11-03	F	2015-11-24	10.2	Control	2015-12-06	33
2015-11-16	UMHET3-45	2015-11-04	F	2015-11-25	11.3	Control	2015-12-07	33
2015-11-04	UMHET3-44	2015-10-23	F	2015-11-13	10.8	Female	2015-11-25	33
2015-11-04	UMHET3-44	2015-10-23	F	2015-11-13	9.8	Female	2015-11-25	33
2015-11-03	UMHET3-38	2015-10-22	F	2015-11-12	10.1	Female	2015-11-25	34
2015-10-21	UMHET3-36	2015-10-09	F	2015-10-30	11.9	Control	2015-11-14	36
2015-10-20	UMHET3-35	2015-10-08	F	2015-10-29	10.2	Female	2015-11-14	37
2015-10-20	UMHET3-35	2015-10-08	F	2015-10-29	9.5	Female	2015-11-14	37
2015-11-04	UMHET3-41	2015-10-23	F	2015-11-13	10.6	Control	2015-11-30	38
2015-11-04	UMHET3-41	2015-10-23	F	2015-11-13	10.5	Control	2015-11-30	38
2015-11-05	UMHET3-42	2015-10-24	F	2015-11-14	9.5	Control	2015-12-01	38
2015-11-04	UMHET3-44	2015-10-23	F	2015-11-13	9.3	Female	2015-11-30	38
2015-11-07	UMHET3-49	2015-10-26	F	2015-11-16	10.9	Female	2015-12-03	38
2015-11-07	UMHET3-49	2015-10-26	F	2015-11-16	11.6	Female	2015-12-03	38
2015-11-07	UMHET3-49	2015-10-26	F	2015-11-16	10.2	Female	2015-12-04	39
2015-11-03	UMHET3-43	2015-10-22	F	2015-11-12	9	Male	2015-11-30	39
2015-11-05	UMHET3-42	2015-10-24	F	2015-11-14	10	Control	2015-12-03	40
2015-10-20	UMHET3-35	2015-10-08	F	2015-10-29	9.9	Female	2015-11-17	40
2015-11-03	UMHET3-38	2015-10-22	F	2015-11-12	9.8	Female	2015-12-02	41
2015-10-19	UMHET3-32	2015-10-07	F	2015-10-28	10.7	Female	2015-11-19	43
2015-10-19	UMHET3-32	2015-10-07	F	2015-10-28	9.5	Female	2015-11-30	54
