# Supplementary figures and images for: Lifespan extension in female mice by early, transient exposure to adult female olfactory cues
Source: eLife journal article supplement (doi:10.7554/elife.84060), 2022-12-16

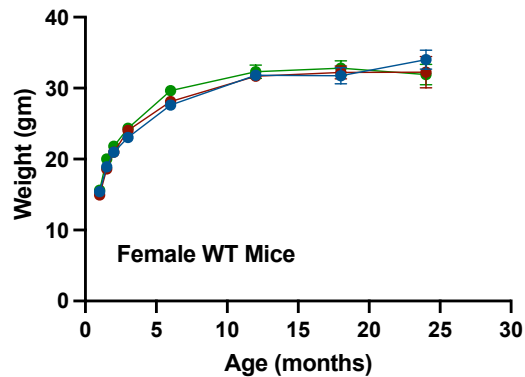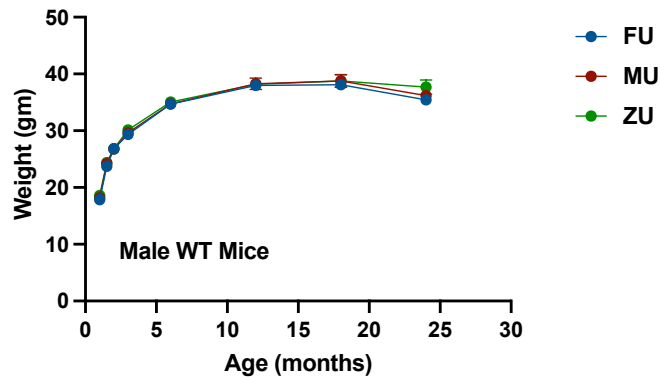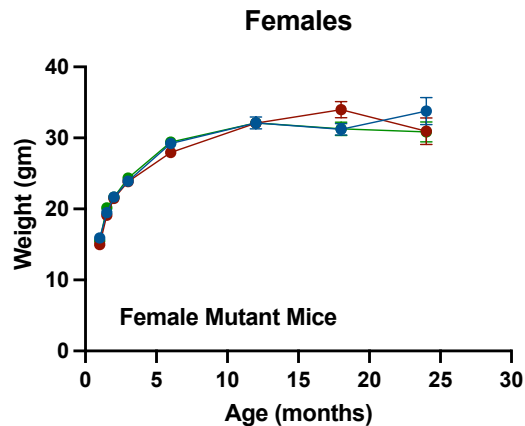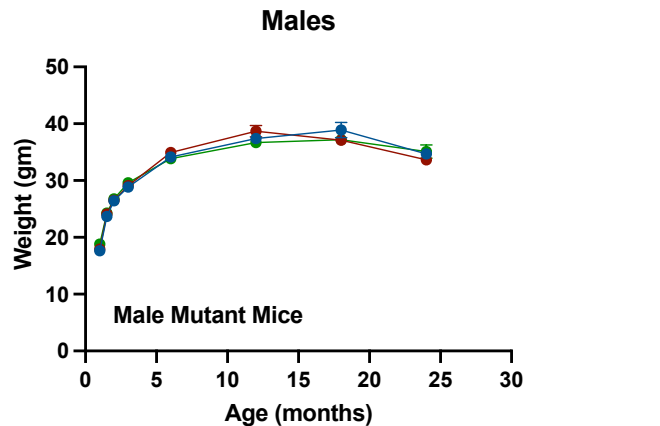

Supplement: supp [file elife-84060-supp-v1.zip]

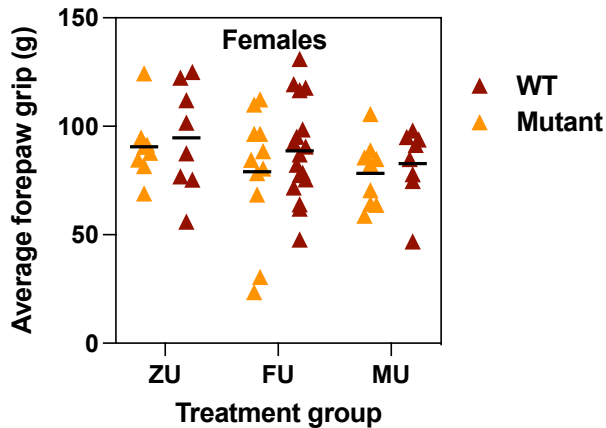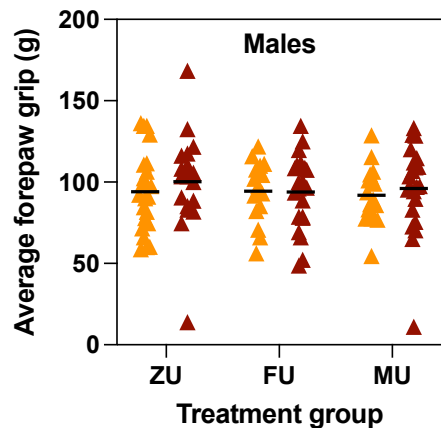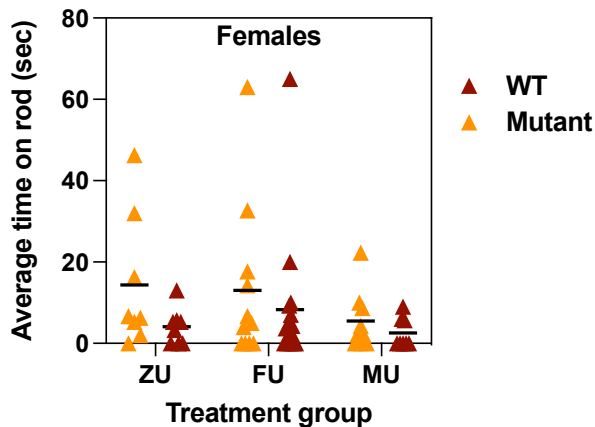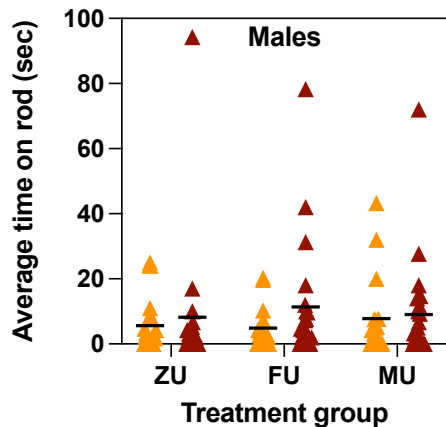

Supplement: supp [file elife-84060-supp-v1.zip]
